# Supplementary material for: Solvent strategy for unleashing the Lewis acidity of titanocene dichloride for rapid Mannich reactions
Source: Royal Society of Chemistry journal article supplement (doi:10.1039/c5ra27094d), 2016-01-01

## Supporting information

# Solvent Strategy for Unleashing Lewis Acidity of Titanocene Dichloride for Rapid Mannich Reactions

Ya Wu,<sup>a,b</sup> Xiu Wang,<sup>a</sup> Yanlong Luo,<sup>a</sup> Jing Wang,<sup>a</sup> Yajun Jian,<sup>a</sup> Huaming Sun,<sup>a</sup>  
Guofang Zhang,<sup>a</sup> Weiqiang Zhang,<sup>\*a</sup> and Ziwei Gao<sup>\*a</sup>

<sup>a</sup> Key Laboratory of Applied Surface and Colloid Chemistry (Ministry of Education), School of Chemistry and Chemical Engineering, Shaanxi Normal University, Xi'an 710062, P. R. China

<sup>b</sup> College of Chemistry and Chemical Engineering, Xi'an Shiyou University, Xi'an 710065, P. R. China

## Contents

|                                                                      |     |
|----------------------------------------------------------------------|-----|
| 1. General procedures.....                                           | S2  |
| 2. Typical procedures for three-component Mannich reactions .....    | S2  |
| 3. NMR experiments .....                                             | S2  |
| 4. Spectrometric analysis.....                                       | S3  |
| 5. Characterization data of products .....                           | S4  |
| 6. ESI mass spectra .....                                            | S15 |
| 7. Copies of <sup>1</sup> H NMR and <sup>13</sup> C NMR spectra..... | S18 |

## 1. General procedures

$^1\text{H}$  and  $^{13}\text{C}$  NMR spectra were recorded on a Bruker EQUINX55 (400 MHz for  $^1\text{H}$ ; 101 MHz for  $^{13}\text{C}$ ) spectrometer in  $\text{CDCl}_3$ . For  $^1\text{H}$  NMR, tetramethylsilane (TMS) served as internal standard ( $\delta = 0$ ) and  $^1\text{H}$  NMR chemical shifts are reported in ppm downfield of tetramethylsilane and referenced to residual solvent peak ( $\text{CDCl}_3$  at 7.26 ppm) unless otherwise noted. The data are reported as follows: chemical shift, integration, multiplicity (s = singlet, d = doublet, t = triplet, q = quartet and m = multiplet), and coupling constant in Hz. For  $^{13}\text{C}$  NMR,  $\text{CDCl}_3$  was used as internal standard ( $\delta = 77.0$ ) and spectra were obtained with complete proton decoupling. Infrared (IR) spectra were obtained using a Thermo Electron Nicolet 380 FT-IR spectrometer and reported as wavenumbers ( $\text{cm}^{-1}$ ). Column chromatography was performed on silica gel (230-400 mesh) and analytical thin layer chromatography was carried out using 250  $\mu\text{m}$  commercial silica gel plates. Visualization of the developed chromatogram was performed by UV absorbance and stained with an iodine vapor.

## 2. Typical procedures for three-component Mannich reactions

A nitrogen flushed 10 mL test tube, equipped with a magnetic stirrer and a septum, was charged with methanol (0.5 mL), benzaldehyde (1.0 mmol), aniline (1.0 mmol), and the aromatic/ aliphatic ketone (2.0 mmol) in one portion.  $\text{Cp}_2\text{TiCl}_2$  (0.01 mmol) was added at 25  $^\circ\text{C}$  and stirred until the reaction was completed as indicated by TLC. Upon completion of the reaction, the reaction mixture was quenched with distilled water (5.0 mL). The aqueous phase was extracted with ether ( $3 \times 5$  mL), dried over  $\text{Na}_2\text{SO}_4$  and concentrated in vacuo to give desired products. The crude product was purified by flash column chromatography on neutral silica gel (ethyl acetate: n-hexane).

## 3. NMR experiments

The interplay of  $\text{Cp}_2\text{TiCl}_2$  and methanol was investigated by  $^1\text{H}$  NMR in mechanistic scenario (Figure S1). A general procedure was as follows:  $\text{Cp}_2\text{TiCl}_2$  (10  $\mu\text{mol}$ ) was placed in  $\text{CD}_3\text{OD}$  (0.5mL) and the solution was detected immediately as observed by  $^1\text{H}$  NMR spectroscopy. The mixture was allowed to stand for 1 h and was conducted by  $^1\text{H}$  NMR spectroscopy as confirmed by  $^1\text{H}$  NMR spectroscopy. After 1.0 equiv. of aniline was added in the above solution, one new Cp protons singlet appeared at  $\delta$  6.70 ppm. Titanocene chloride (**I**) was consumed gradually in  $\text{CD}_3\text{OD}$  in the presence of base and formed new titanocene species  $\text{Cp}_2\text{Ti}(\text{OCH}_3)_2$  (**II**) (Scheme S1).

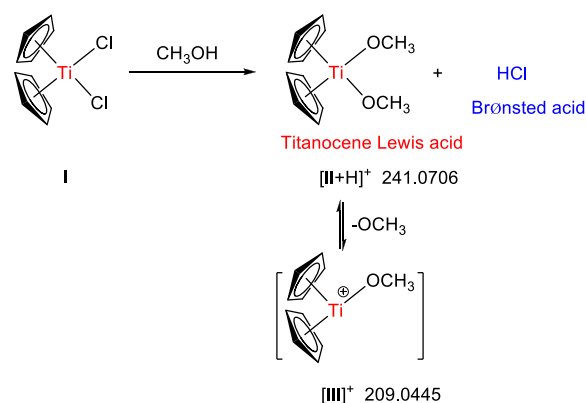

**Scheme S1.** The coordination of  $\text{Cp}_2\text{TiCl}_2$  with  $\text{CH}_3\text{OH}$  unleashed Lewis acidity and Brønsted acidity by  $^1\text{H}$  NMR and ESI-MS.

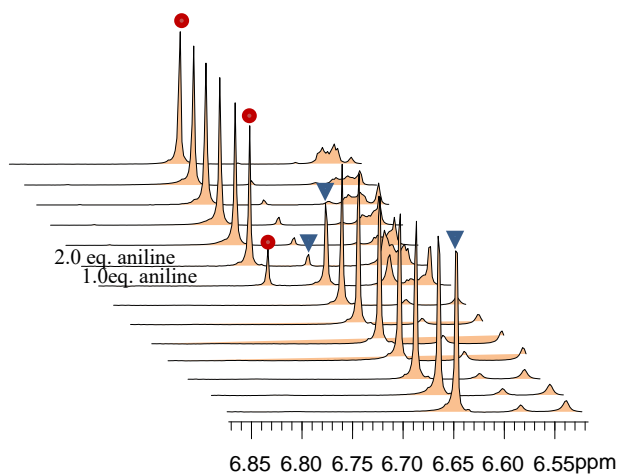

**Figure S1.** Partial 400MHz  $^1\text{H}$  NMR spectra ( $\text{CD}_3\text{OD}$ ) of a solution containing  $\text{Cp}_2\text{TiCl}_2$  with addition of aniline.

▼ 6.64 ppm I [ $\text{Cp}_2\text{TiCl}_2$ ];      ● 6.70 ppm II [ $\text{Cp}_2\text{Ti}(\text{OCH}_3)_2$ ]

#### 4. Spectrometric analysis

Mass spectrometric measurements were performed in a Bruker EVOQ tandem mass spectrometer. As a general rule, scan mode was Q1MS, positive ion mode (otherwise indicated), tube lens potential was optimized in each case or for a series of measurements that required equal conditions, a time span of 1 minute was used to collect spectra and average them. The tube lens potential was adjusted in a way that the most interest ions had almost no attenuation (around 70 V).

For CID experiments, the cations of interest were mass-selected using the first quadrupole (Q1) and interacted with argon in the T-wave collision cell at variable collision energies (Elaboratory= 3-15 eV). The ionic products of fragmentation were analyzed with the time-of-flight analyzer. The isolation width was 1Da and the most abundant isotopomer was mass-selected in the first quadrupole analyzer.

## 5. Characterization data of products

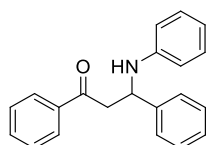

**4a**

**1,3-Diphenyl-3-(N-phenylamino)propan-1-one (4a):** Yield, 95%; white solid; mp 170-172 °C; *R<sub>f</sub>* 0.51 (hexane/ethyl acetate = 4:1); IR (KBr): 3383, 1669; HRMS (ESI) *m/z* 302.1498 [C<sub>21</sub>H<sub>19</sub>NO (M+1) requires 302.1545]; <sup>1</sup>H NMR (400 MHz, CDCl<sub>3</sub>) δ 7.89-7.91 (m, 2H), 7.56 (dd, *J* = 10.5, 4.3, 1H), 7.45 (dd, *J* = 10.5, 4.5, 4H), 7.32 (t, *J* = 7.5, 2H), 7.23 (t, *J* = 7.3, 1H), 7.06-7.09 (m, 2H), 6.68 (t, *J* = 7.3, 1H), 6.56-6.59 (m, 2H), 5.02 (dd, *J* = 7.4, 5.4, 1H), 3.48 (qd, *J* = 16.1, 6.4, 2H); <sup>13</sup>C NMR (101 MHz, CDCl<sub>3</sub>) δ 198.26, 146.78, 142.81, 136.76, 133.40, 129.11, 128.82, 128.69, 128.20, 127.39, 126.43, 118.02, 114.04, 55.03, 46.21.

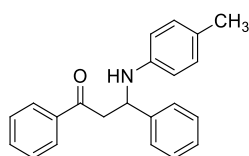

**4b**

**3-[N-(4-Methylphenylamino)]-1,3-diphenylpropan-1-one (4b):** Yield, 95%; white solid; mp 125-126 °C; *R<sub>f</sub>* 0.45 (hexane/ethyl acetate = 4:1); IR (KBr): 3376, 1674; HRMS (ESI) *m/z* 316.1689 [C<sub>22</sub>H<sub>21</sub>NO (M+1) requires 316.1701]; <sup>1</sup>H NMR (400 MHz, CDCl<sub>3</sub>) δ 7.90 (d, *J* = 8.1 Hz, 2H), 7.54 (d, *J* = 7.3 Hz, 1H), 7.43 (m, 4H), 7.31 (t, *J* = 7.5 Hz, 2H), 7.24 (m, 1H), 6.89 (d, *J* = 8.1 Hz, 2H), 6.48 (d, *J* = 8.2 Hz, 2H), 4.97 (m, 1H), 4.40 (s, 1H), 3.45 (ddd, *J* = 23.7, 16.1, 6.4 Hz, 2H), 2.17 (s, 3H); <sup>13</sup>C NMR (101 MHz, CDCl<sub>3</sub>) δ 198.32, 144.71, 143.17, 136.80, 133.34, 129.59, 128.78, 128.66, 128.19, 127.28, 127.00, 126.39, 114.03, 55.11, 46.36, 20.33.

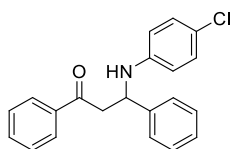

**4c**

**3-[N-(4-chlorophenylamino)]-1,3-diphenylpropan-1-one (4c):** Yield, 85%; yellowish solid; mp 167-168 °C; Rf 0.40 (hexane/ethyl acetate = 4:1); IR (KBr): 3370, 1665; HRMS (ESI)  $m/z$  336.1140 [ $C_{21}H_{18}ClNO$  (M+1) requires 336.1155];  $^1H$  NMR (400 MHz,  $CDCl_3$ )  $\delta$  7.90 (d,  $J = 7.8$ , 2H), 7.56 (t,  $J = 7.3$ , 1H), 7.42-7.44 (m, 4H), 7.32 (t,  $J = 7.5$ , 2H), 7.24 (s, 1H), 7.02 (d,  $J = 8.7$ , 2H), 6.47 (d,  $J = 8.7$ , 2H), 4.93-4.96 (m, 1H), 4.61 (s, 1H), 3.37-3.47 (m, 2H);  $^{13}C$  NMR (101 MHz,  $CDCl_3$ )  $\delta$  198.16, 145.58, 142.51, 136.65, 133.51, 128.92, 128.90, 128.73, 128.19, 127.50, 126.29, 122.48, 114.98, 54.95, 46.20.

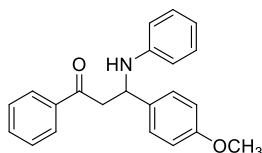

**4d**

**3-(4-Methoxyphenyl)-1-phenyl-3-(N-phenylamino)propan-1-one (4d):** Yield, 96%; white solid; mp 150-151 °C; Rf 0.32 (hexane/ethyl acetate = 4:1); IR (KBr): 3374, 1664; HRMS (ESI)  $m/z$  332.1647 [ $C_{22}H_{21}NO_2$  (M+1) requires 332.1650];  $^1H$  NMR (400 MHz,  $CDCl_3$ )  $\delta$  7.88 (d,  $J = 7.3$ , 2H), 7.53 (t,  $J = 7.4$ , 1H), 7.41 (t,  $J = 7.7$ , 2H), 7.35 (d,  $J = 8.6$ , 2H), 7.09 (t,  $J = 7.9$ , 2H), 6.83 (d,  $J = 8.7$ , 2H), 6.71 (t,  $J = 7.3$ , 1H), 6.63 (d,  $J = 7.8$ , 2H), 4.97 (t,  $J = 6.4$ , 1H), 3.74 (s, 3H), 3.49-3.56 (m, 2H);  $^{13}C$  NMR (101 MHz,  $CDCl_3$ )  $\delta$  198.16, 158.98, 145.81, 136.78, 134.04, 133.36, 129.15, 128.67, 128.20, 127.79, 118.87, 114.90, 114.21, 55.28, 55.24, 45.86.

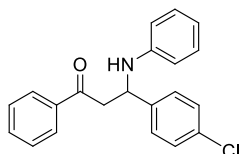

**4e**

**3-(4-Chlorophenyl)-1-phenyl-3-(N-phenylamino)propan-1-one(4e):** Yield, 88%; white solid; mp 114-115 °C; Rf 0.39 (hexane/ethyl acetate = 4:1); IR (KBr): 3398, 1676; HRMS (ESI)  $m/z$  336.1140

[C<sub>21</sub>H<sub>18</sub>NOCl (M+1) requires 336.1155]; <sup>1</sup>H NMR (400 MHz, CDCl<sub>3</sub>) δ 7.87 (d, *J* = 8.0, 2H), 7.52-7.54 (m, 1H), 7.41 (t, *J* = 7.6, 2H), 7.35 (d, *J* = 8.2, 2H), 7.22-7.25 (m, 2H), 7.06 (t, *J* = 7.6, 2H), 6.65 (t, *J* = 7.2, 1H), 6.51 (d, *J* = 8.3, 2H), 4.95 (t, *J* = 6.3, 1H), 4.54 (s, 1H), 3.40-3.43 (m, 2H); <sup>13</sup>C NMR (101 MHz, CDCl<sub>3</sub>) δ 197.91, 146.74, 141.56, 136.63, 133.56, 132.99, 129.17, 128.97, 128.77, 128.18, 127.86, 118.09, 113.89, 54.21, 46.11.

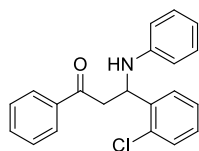

**4f**

**3-(2-Chlorophenyl)-1-phenyl-3-[N-(phenylamino)]propan-1-one (4f):** Yield, 74%; white solid; mp 52-53 °C; R<sub>f</sub> 0.48 (hexane/ethyl acetate = 5:1); IR (KBr): 3402, 1675; HRMS (ESI) *m/z* 336.1156 [C<sub>21</sub>H<sub>18</sub>ClNO (M+1) requires 336.1155]; <sup>1</sup>H NMR (400 MHz, CDCl<sub>3</sub>) δ 7.97 (d, *J* = 8.0 Hz, 2H), 7.54 (dd, *J* = 10.6, 6.8 Hz, 2H), 7.42-7.44 (m, 3H), 7.15-7.17 (m, 2H), 7.07 (t, *J* = 7.8 Hz, 2H), 6.64 (t, *J* = 7.3 Hz, 1H), 6.47 (d, *J* = 8.5 Hz, 2H), 5.30 (d, *J* = 5.0 Hz, 1H), 4.90 (s, 1H), 3.61 (dd, *J* = 15.5, 3.9 Hz, 1H), 3.29 (dd, *J* = 15.5, 8.7 Hz, 1H); <sup>13</sup>C NMR (101 MHz, CDCl<sub>3</sub>) δ 197.49, 145.48, 138.52, 135.50, 132.51, 131.34, 128.80, 128.08, 127.69, 127.51, 127.33, 127.09, 126.41, 116.86, 112.60, 51.01, 42.74.

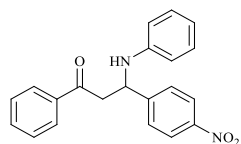

**4g**

**3-(4-nitrophenyl)-1-phenyl-3-(phenylamino)-1-propanone (4g):** Yield, 75%; yellow solid; mp 154-156 °C; R<sub>f</sub> 0.32 (hexane/ethyl acetate = 5:1); IR (KBr): 3402, 1675; HRMS (ESI) *m/z* 347.1121 [C<sub>21</sub>H<sub>18</sub>N<sub>2</sub>O<sub>3</sub> (M+1) requires 347.1396]; δ<sub>H</sub> (400 MHz, CDCl<sub>3</sub>) 8.08 (d, *J* = 8.7 Hz, 2H), 7.87-7.78 (m, 2H), 7.58-7.47 (m, 3H), 7.37 (t, *J* = 7.7 Hz, 2H), 7.02 (t, *J* = 7.9 Hz, 2H), 6.62 (t, *J* = 7.3 Hz, 1H), 6.44 (d, *J* = 7.8 Hz, 2H), 5.03 (s, 1H), 4.61 (s, 1H), 3.43 (d, *J* = 6.2 Hz, 2H); δ<sub>C</sub> (101 MHz, CDCl<sub>3</sub>) 197.3, 150.8, 147.2, 146.3, 136.4, 133.8, 129.3, 128.9, 128.2, 127.5, 124.1, 118.5, 113.9, 77.4, 77.1, 76.8, 54.2, 45.7.

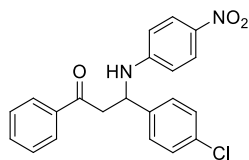

**4h**

**3-[N-(4-Nitrophenylamino)]-3-(4-Chlorophenyl)-1-phenylpropan-1-one (4h):** Yield: 81%; yellow solid; mp 137-138 °C; *R<sub>f</sub>* 0.25 (hexane/ethyl acetate = 4:1); IR (KBr): 3369, 1687; HRMS (ESI) *m/z* 381.1117 [C<sub>21</sub>H<sub>17</sub>ClN<sub>2</sub>O<sub>3</sub> (M+1) requires 381.1106]; <sup>1</sup>H NMR (400 MHz, CDCl<sub>3</sub>) δ 8.00 (d, *J* = 9.1 Hz, 2H), 7.88 (d, *J* = 7.4 Hz, 2H), 7.59 (t, *J* = 7.4 Hz, 1H), 7.45 (d, *J* = 7.6 Hz, 2H), 7.32 (q, *J* = 8.6 Hz, 4H), 6.50 (d, *J* = 9.1 Hz, 2H), 5.08 (t, *J* = 6.0 Hz, 1H), 3.51 (m, 2H); <sup>13</sup>C NMR (101 MHz, CDCl<sub>3</sub>) δ 197.53, 151.91, 139.68, 138.80, 136.32, 133.92, 133.70, 129.29, 128.87, 128.16, 127.62, 126.16, 112.28, 53.80, 45.25.

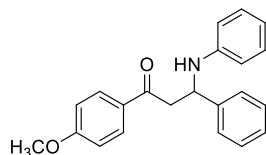

**4i**

**1-(4-Methoxyphenyl)-3-phenyl-3-(N-phenylamino)propan-1-one (4i):** Yield, 90%; white solid; mp 123-124 °C; *R<sub>f</sub>* 0.42 (hexane/ethyl acetate = 4:1); IR (KBr): 3383, 1659; HRMS (ESI) *m/z* 332.1650 [C<sub>22</sub>H<sub>21</sub>NO<sub>2</sub> (M+1) requires 332.1651]; <sup>1</sup>H NMR (400 MHz, CDCl<sub>3</sub>) δ 7.81 (d, *J* = 8.9 Hz, 2H), 7.36 (d, *J* = 7.4 Hz, 2H), 7.24 (t, *J* = 7.5 Hz, 2H), 7.16 (dd, *J* = 13.4, 6.1 Hz, 1H), 7.00 (dd, *J* = 8.4, 7.5 Hz, 2H), 6.83 (d, *J* = 8.9 Hz, 2H), 6.57 (t, *J* = 7.3 Hz, 1H), 6.47 (d, *J* = 7.7 Hz, 2H), 4.89 (dd, *J* = 7.6, 5.1 Hz, 1H), 4.53 (s, 1H), 3.78 (s, 3H), 3.24-3.40 (m, 2H); <sup>13</sup>C NMR (101 MHz, CDCl<sub>3</sub>) δ 196.77, 163.77, 147.10, 143.18, 130.56, 129.85, 129.07, 128.80, 127.28, 126.36, 117.69, 113.85, 113.82, 55.50, 55.06, 46.00.

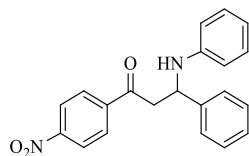

**4j**

**3-(4-Nitrophenyl)-1-phenyl-3-(N-phenylamino)propan-1-one (4j):** Yield, 81%; yellow solid; mp 121-122 °C; *R<sub>f</sub>* 0.21 (hexane/ethyl acetate = 4:1); IR (KBr): 3403, 1674; HRMS (ESI) *m/z* 347.1399

[C<sub>21</sub>H<sub>18</sub>N<sub>2</sub>O<sub>3</sub> (M+1) requires 347.1396]; <sup>1</sup>H NMR (400 MHz, CDCl<sub>3</sub>) δ 8.26 (d, *J* = 8.6, 2H), 8.00 (d, *J* = 8.6, 2H), 7.42-7.44 (m, 2H), 7.32 (t, *J* = 7.4, 2H), 7.22-7.25 (m, 1H), 7.11 (t, *J* = 7.7, 2H), 6.71 (t, *J* = 7.3, 1H), 6.60 (d, *J* = 8.0, 2H), 5.04 (t, *J* = 6.3, 1H), 3.55 (d, *J* = 5.7, 2H); <sup>13</sup>C NMR (101 MHz, CDCl<sub>3</sub>) δ 196.83, 150.42, 146.45, 142.03, 141.12, 129.24, 129.16, 128.96, 127.73, 126.41, 123.88, 118.49, 114.13, 54.90, 46.47.

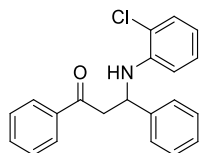

**4k**

**1,3-diphenyl-3-[N-(2-Chlorophenylamino)]propan-1-one (4k):** Yield, 76%; white solid; mp 77-78 °C; Rf 0.50 (hexane/ethyl acetate = 4:1); IR (KBr): 3478, 3554, 3413, 1620; HRMS (ESI) *m/z* 336.1150 [C<sub>21</sub>H<sub>18</sub>ClNO (M+1) requires 336.1155]; <sup>1</sup>H NMR (400 MHz, CDCl<sub>3</sub>) δ 7.90-7.92 (m, 2H), 7.56 (t, *J* = 7.4 Hz, 1H), 7.41-7.44 (m, 4H), 7.32 (t, *J* = 7.5 Hz, 2H), 7.21-7.25 (m, 2H), 6.95-6.99 (m, 1H), 6.58 (td, *J* = 7.7, 1.3 Hz, 1H), 6.51 (dd, *J* = 8.2, 1.2 Hz, 1H), 5.15 (s, 1H), 5.09 (t, *J* = 6.3 Hz, 1H), 3.52 (d, *J* = 6.1 Hz, 2H); <sup>13</sup>C NMR (101 MHz, CDCl<sub>3</sub>) δ 196.72, 141.80, 141.36, 135.78, 132.40, 128.03, 127.86, 127.68, 127.18, 126.60, 126.48, 125.28, 118.59, 116.67, 111.69, 53.48, 45.42.

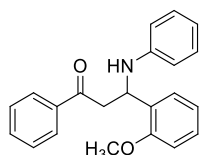

**4l**

**3-(4-Methoxyphenyl)-1-phenyl-3-(N-phenylamino)propan-1-one (4l):** Yield, 85%; white solid; mp 56-57 °C; Rf 0.43 (hexane/ethyl acetate = 4:1); IR (KBr): 3403, 1682; HRMS (ESI) *m/z* 332.1643 [C<sub>22</sub>H<sub>21</sub>NO<sub>2</sub> (M+1) requires 332.1650]; <sup>1</sup>H NMR (400 MHz, CDCl<sub>3</sub>) δ 7.88-7.91 (m, 2H), 7.41-7.43 (m, 1H), 7.30-7.34 (m, 3H), 7.12 (dd, *J* = 12.8, 4.7 Hz, 1H), 6.96 (dd, *J* = 8.4, 7.4 Hz, 2H), 6.80 (m, 2H), 6.53 (d, *J* = 7.3 Hz, 1H), 6.43 (d, *J* = 7.7 Hz, 2H), 5.18 (dd, *J* = 8.4, 4.5 Hz, 1H), 3.85 (s, 3H), 3.55 (dd, *J* = 15.1, 4.5 Hz, 1H), 3.13 (dd, *J* = 15.2, 8.4 Hz, 1H); <sup>13</sup>C NMR (101 MHz, CDCl<sub>3</sub>) δ 199.08, 156.59, 147.10, 136.77, 133.26, 130.06, 129.06, 128.61, 128.58, 128.42, 128.27, 127.65, 121.01, 117.50, 113.73, 110.55, 55.39, 50.71, 44.53.



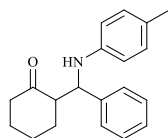

**4m**

**2-[[4-(4-methylphenyl)amino]phenylmethyl]-cyclohexanone (4m):** Yield, 88%; white solid; Rf 0.48 (hexane/ethyl acetate = 4:1); IR (KBr): 3380, 1697; HRMS (ESI)  $m/z$  294.1837 [ $C_{20}H_{23}NO$  (M+1) requires 294.1859]; Major isomer:  $^1H$  NMR (400 MHz,  $CDCl_3$ ) 7.38 (2 H, t,  $J = 7.4$ , ArH), 7.34-7.28 (2 H, m, ArH), 7.23 (1 H, dd,  $J_1 = 10.5$ ,  $J_2 = 3.9$ , ArH), 6.91 (2 H, dd,  $J_1 = 7.9$ ,  $J_2 = 5.8$ , ArH), 6.50 (2 H, t,  $J = 8.4$ , ArH), 4.81 (0.38 H, d,  $J = 4.4$ , syn-CH), 4.63 (0.62 H, d,  $J = 7.2$ , anti-CH), 4.52 (1 H, br, NH), 2.83-2.72 (1 H, m, CH), 2.47-2.40 (1 H, m,  $CH_2$ ), 2.35 (1 H, dd,  $J_1 = 13.1$ ,  $J_2 = 5.1$ ,  $CH_2$ ), 2.20 (3 H, d,  $J = 4.9$ ,  $CH_3$ ), 2.10-2.00 (1 H, m,  $CH_2$ ), 1.88 (3 H, m,  $CH_2$ ), 1.76-1.66 (2 H, m,  $CH_2$ ).  $^{13}C$  NMR (101 MHz,  $CDCl_3$ ) 212.86, 211.39, 145.27, 144.98, 141.92, 141.80, 129.59, 129.55, 128.47, 128.37, 127.55, 127.33, 127.14, 126.96, 126.86, 126.69, 114.31, 113.84, 58.25, 57.61, 57.56, 56.71, 42.43, 41.72, 31.20, 28.69, 27.90, 27.07, 24.88, 23.63, 20.39, 20.36.

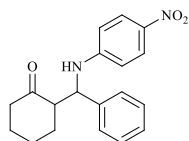

**4n**

**2-[[4-(4-nitrophenyl)amino]phenylmethyl]-cyclohexanone (4n):** Yield, 81%; yellow solid; Rf 0.40 (hexane/ethyl acetate = 4:1); IR (KBr): 3374, 1705; HRMS (ESI)  $m/z$  325.1528 [ $C_{19}H_{20}N_2O_3$  (M+1) requires 325.1552]; Major isomer:  $^1H$  NMR (400 MHz,  $CDCl_3$ ) 7.98 (2 H, d,  $J = 9.2$ , ArH), 7.32 (4 H, d,  $J = 4.3$ , ArH), 7.25 (1 H, d,  $J = 5.4$ , ArH), 6.49 (2 H, d,  $J = 9.2$ , ArH), 5.75 (0.13 H, d,  $J = 7.6$ , anti-NH), 5.59 (0.85 H, d,  $J = 7.1$ , syn-NH), 4.86 (0.87 H, dd,  $J_1 = 7.2$ ,  $J_2 = 4.4$ , syn-CH), 4.65 (0.13 H, m, anti-CH), 2.86 (1 H, dt,  $J_1 = 9.5$ ,  $J_2 = 4.6$ , CH), 2.37 (2 H, m,  $CH_2$ ), 2.05 (2 H, dd,  $J_1 = 15.6$ ,  $J_2 = 9.6$ ,  $CH_2$ ), 1.90 (1 H, d,  $J = 6.9$ ,  $CH_2$ ), 1.59 (3 H, m,  $CH_2$ ).  $^{13}C$  NMR (101 MHz,  $CDCl_3$ ) 212.50, 211.07, 152.77, 152.66, 140.23, 139.72, 138.24, 138.20, 128.76, 128.69, 127.68, 127.65, 127.45, 126.98, 126.20, 126.14, 112.22, 111.98, 58.12, 57.12, 56.90, 55.61, 42.46, 42.28, 32.32, 28.69, 28.09, 26.59, 24.69, 24.34.

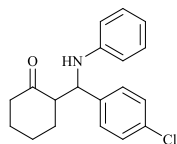

**4o**

**2-[(4-chlorophenyl)(phenylamino)methyl]-cyclohexanone (4o):** Yield, 85%; yellow solid; Rf 0.45 (hexane/ethyl acetate = 4:1); IR (KBr): 3386, 1696; HRMS (ESI)  $m/z$  314.1330 [ $C_{19}H_{20}NOCl$  (M+1) requires 314.1312]; Major isomer:  $^1H$  NMR (400 MHz,  $CDCl_3$ ) 7.91 (2 H, d,  $J = 9.1$ , ArH), 7.21 (5 H, d,  $J = 1.6$ , ArH), 6.40 (2 H, d,  $J = 9.2$ , ArH), 5.65 (0.42 H, d,  $J = 7.6$ , anti-NH), 5.53 (0.58 H, d,  $J = 7.2$ , syn-NH), 4.71 (0.58 H, dd,  $J_1 = 7.1$ ,  $J_2 = 4.6$ , syn-CH), 4.55 (0.42 H, dd,  $J_1 = 7.4$ ,  $J_2 = 5.6$ , anti-CH), 2.78 (1 H, m, CH), 2.30 (2 H, m,  $CH_2$ ), 1.90 (4 H, d,  $J = 51.2$ ,  $CH_2$ ), 1.62 (2 H, dd,  $J_1 = 20.9$ ,  $J_2 = 10.2$ ,  $CH_2$ ).  $^{13}C$  NMR (101 MHz,  $CDCl_3$ ) 211.16, 209.94, 151.49, 151.29, 137.85, 137.55, 137.50, 137.19, 132.48, 132.42, 127.99, 127.92, 127.85, 127.37, 125.20, 125.13, 111.23, 110.99, 56.69, 55.91, 55.79, 54.39, 41.60, 41.30, 31.44, 28.03, 27.01, 25.56, 23.70, 23.53.

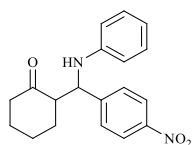

**4p**

**2-[(4-nitrophenyl)(phenylamino)methyl]-cyclohexanone (4p):** Yield, 72%; yellow solid; Rf 0.41 (hexane/ethyl acetate = 4:1); IR (KBr): 3374, 1701; HRMS (ESI)  $m/z$  325.1520 [ $C_{19}H_{20}N_2O_3$  (M+1) requires 325.1552]; Major isomer:  $^1H$  NMR (400 MHz,  $CDCl_3$ ) 8.14 (2 H, d,  $J = 8.8$ , ArH), 7.56 (2 H, m, ArH), 7.07 (2 H, t,  $J = 7.9$ , ArH), 6.66 (1 H, dd,  $J_1 = 13.2$ ,  $J_2 = 6.9$ , ArH), 6.49 (2 H, d,  $J = 7.7$ , ArH), 4.86 (0.47 H, d,  $J = 4.5$ , syn-CH), 4.71 (0.53 H, d,  $J = 5.3$ , anti-CH), 4.86 (0.47 H, br, syn-NH), 4.60 (0.47 H, br, anti-NH), 2.85 (1 H, dd,  $J_1 = 11.0$ ,  $J_2 = 5.0$ , CH), 2.37 (2 H, dt,  $J_1 = 26.2$ ,  $J_2 = 13.9$ ,  $CH_2$ ), 2.00 (3 H, m,  $CH_2$ ), 1.70 (3 H, m,  $CH_2$ ).  $^{13}C$  NMR (101 MHz,  $CDCl_3$ ) 211.74, 210.60, 149.89, 149.61, 147.08, 147.03, 146.71, 146.67, 129.27, 129.17, 128.62, 128.27, 123.66, 123.61, 118.37, 118.10, 114.05, 113.50, 57.77, 57.21, 57.03, 56.21, 42.45, 42.41, 32.01, 29.09, 27.78, 27.05, 24.94, 24.49.

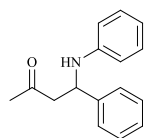

**4q**

**4-phenyl-4-(phenylamino)-2-butanone (4q):** Yield, 71%; white solid; mp 90-92 °C; Rf 0.43 (hexane/ethyl acetate = 4:1); IR (KBr): 3369, 1704; HRMS (ESI)  $m/z$  240.1361 [ $C_{16}H_{17}NO$  (M+1) requires 240.1388];  $^1H$  NMR (400 MHz,  $CDCl_3$ ) 7.26 (m, 4H), 7.16 (d,  $J = 6.0$  Hz, 1H), 7.01 (t,  $J = 7.8$  Hz, 2H), 6.59 (t,  $J = 7.3$  Hz, 1H), 6.47 (d,  $J = 8.1$  Hz, 2H), 4.77 (t,  $J = 6.5$  Hz, 1H), 4.36 (s, 1H), 2.84 (d,  $J = 6.5$  Hz, 2H), 2.02 (s, 3H);  $^{13}C$  NMR (101 MHz,  $CDCl_3$ ) 206.1, 145.8, 141.5, 128.1, 127.8, 126.3, 125.2, 116.8, 112.7, 53.3, 50.2, 29.7.

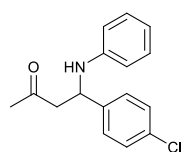

**4r**

**4-(4-chlorophenyl)-4-(phenylamino)-2-butanone(4r).** Yield, 68%; yellow solid; mp 122-124 °C; Rf 0.40 (hexane/ethyl acetate = 4:1); IR (KBr): 3367, 1706; HRMS (ESI)  $m/z$  274.0908 [ $C_{16}H_{16}NOCl$  (M+1) requires 274.0920];  $^1H$  NMR (400 MHz,  $CDCl_3$ ):  $\delta$  7.22 (m, 4H), 7.04 (t,  $J = 7.7$  Hz, 2H), 6.62 (t,  $J = 7.2$  Hz, 1H), 6.45 (d,  $J = 8.0$  Hz, 2H), 4.75 (t,  $J = 6.3$  Hz, 1H), 4.38 (s, 1H), 2.85 (d,  $J = 6.3$  Hz, 2H), 2.05 (s, 3H).  $^{13}C$  NMR (101 MHz,  $CDCl_3$ ):  $\delta$  206.7, 146.5, 141.1, 133.0, 129.2, 129.0, 127.7, 118.1, 113.8, 53.8, 51.0, 30.8.

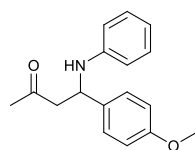

**4s**

**4-(4-methoxyphenyl)-4-(phenylamino)-2-butanone(4s):** Yield, 79%; yellow solid; mp 104-105 °C; Rf 0.44 (hexane/ethyl acetate = 4:1); IR (KBr): 3363, 1707; HRMS (ESI)  $m/z$  270.1461 [ $C_{17}H_{19}NO_2$  (M+1) requires 269.1416];  $^1H$  NMR (400 MHz,  $CDCl_3$ ):  $\delta$  7.27 (d,  $J = 7.0$  Hz, 2H), 7.09 (t,  $J = 7.0$  Hz, 2H), 6.85 (d,  $J = 6.9$  Hz, 2H), 6.66 (t,  $J = 7.3$  Hz, 1H), 6.54 (d,  $J = 7.7$  Hz, 2H), 4.80 (t,  $J = 6.3$  Hz, 1H),

4.38 (s, 1H), 3.77 (s, 3H), 2.90 (d,  $J = 6.5$  Hz, 2H), 2.08 (s, 3H).  $^{13}\text{C}$  NMR (101 MHz,  $\text{CDCl}_3$ ):  $\delta$  207.3, 158.8, 146.8, 134.4, 129.1, 127.4, 117.8, 114.2, 113.8, 55.2, 53.8, 51.3, 30.8.

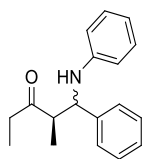

**4t**

**2-Methyl-1-Phenyl-1-(N-phenylamino)pentan-3-one (4t):** Yield, 85%; white solid; mp 105-106 °C; Rf 0.40 (hexane/ethyl acetate = 4:1); IR (KBr): 3407, 3370, 1708; HRMS (ESI)  $m/z$  268.1699 [ $\text{C}_{18}\text{H}_{21}\text{NO}$  (M+1) requires 268.1701]; Major isomer:  $^1\text{H}$  NMR (400 MHz,  $\text{CDCl}_3$ )  $\delta$  7.20-7.26 (m, 5H), 7.02 (t,  $J = 5.9$  Hz, 2H), 6.59 (s, 1H), 6.45 (d,  $J = 5.6$  Hz, 2H), 4.62 (s, 1H), 4.29 (s, 1H, NH), 2.96 (s, 1H), 2.27-2.30 (m, 2H), 1.05-1.07 (m, 3H), 0.89 (td,  $J = 7.2, 4.0$  Hz, 3H);  $^{13}\text{C}$  NMR (101 MHz,  $\text{CDCl}_3$ )  $\delta$  213.30, 147.03, 141.22, 129.06, 128.59, 127.27, 126.85, 117.66, 113.65, 59.24, 52.25, 35.52, 11.57, 7.50.

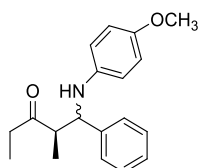

**4u**

**2-Methyl-1-Phenyl-1-[N-(4-Methoxyphenylamino)] pentan-3-one (4u):** Yield, 91%; white solid; Rf 0.53 (hexane/ethyl acetate = 4:1); IR (KBr): 3365, 1703; HRMS (ESI)  $m/z$  298.1802 [ $\text{C}_{19}\text{H}_{23}\text{NO}_2$  (M+1) requires 298.1807]; Major isomer:  $^1\text{H}$  NMR (400 MHz,  $\text{CDCl}_3$ )  $\delta$  7.30 (d,  $J = 4.4$  Hz, 4H), 7.22 (dt,  $J = 8.6, 4.2$  Hz, 1H), 6.66 (d,  $J = 8.9$  Hz, 2H), 6.45 (d,  $J = 8.9$  Hz, 2H), 4.59 (d,  $J = 5.7$  Hz, 1H), 3.68 (s, 3H), 2.98 (dd,  $J = 6.8, 6.0$  Hz, 1H), 2.35 (dd,  $J = 12.6, 7.2$  Hz, 2H), 1.10 (d,  $J = 7.0$  Hz, 3H), 0.93 (t,  $J = 7.2$  Hz, 3H);  $^{13}\text{C}$  NMR (101 MHz,  $\text{CDCl}_3$ )  $\delta$  212.45, 151.15, 140.48, 140.24, 127.54, 126.19, 125.89, 113.87, 113.70, 59.03, 54.67, 51.30, 34.49, 10.49, 6.50.

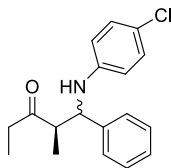

**4v**

**2-Methyl-1-Phenyl-1-[N-(4-Chlorophenylamino)]pentan-3-one (4v):** Yield, 82%; yellowish solid; mp 112-114 °C; Rf 0.32 (hexane/ethyl acetate = 4:1); IR (KBr): 3376, 1715; HRMS (ESI)  $m/z$  306.1309 [ $C_{18}H_{20}ClNO$  (M+1) requires 306.1312]; Major isomer:  $^1H$  NMR (400 MHz,  $CDCl_3$ )  $\delta$  7.37 – 7.17 (m, 5H), 7.06 – 6.92 (m, 2H), 6.47 – 6.30 (m, 2H), 4.59 (d,  $J = 5.0$  Hz, 1H), 4.41 (s, 1H), 2.99 (dd,  $J = 6.9, 5.8$  Hz, 1H), 2.32 (ddd,  $J = 14.3, 8.9, 5.3$  Hz, 2H), 1.10 (d,  $J = 7.0$  Hz, 3H), 0.93 (t,  $J = 7.2$  Hz, 3H);  $^{13}C$  NMR (101 MHz,  $CDCl_3$ )  $\delta$  213.31, 145.59, 140.66, 128.89, 128.68, 127.46, 126.81, 122.34, 114.78, 59.38, 52.04, 35.55, 11.58, 7.48.

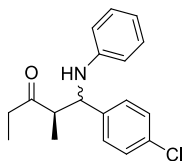

**4w**

**2-Methyl-1-(4-Chlorophenyl)-1-(N-phenylamino) pentan-3-one (4w):** Yield, 81%; yellowish solid; Rf 0.39 (hexane/ethyl acetate = 4:1); IR (KBr): 3376, 1692; HRMS (ESI)  $m/z$  306.1307 [ $C_{18}H_{20}ClNO$  (M+1) requires 306.1312]; Major isomer:  $^1H$  NMR (400 MHz,  $CDCl_3$ )  $\delta$  7.17 (t,  $J = 8.2$  Hz, 4H), 6.99 (t,  $J = 7.5$  Hz, 2H), 6.57 (d,  $J = 7.1$  Hz, 1H), 6.38 (d,  $J = 7.5$  Hz, 2H), 4.56 (d,  $J = 5.3$  Hz, 1H), 2.87-2.90 (m, 1H), 2.24-2.31 (m, 2H), 1.02 (d,  $J = 6.9$  Hz, 3H), 0.87 (t,  $J = 7.1$  Hz, 3H);  $^{13}C$  NMR (101 MHz,  $CDCl_3$ )  $\delta$  211.97, 145.69, 138.85, 131.93, 128.09, 127.76, 127.27, 116.92, 112.66, 57.63, 50.98, 34.55, 10.56, 6.48.

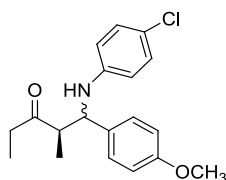

**4x**

**2-Methyl-1-(4-methoxyphenyl)-1-[N-(4-Chlorophenylamino)] pentan-3-one (4x):** Yield, 83%; yellowish solid; Rf 0.48 (hexane/ethyl acetate = 4:1); IR (KBr): 3365, 1720; HRMS (ESI)  $m/z$  332.1415 [ $C_{19}H_{22}ClNO_2$  (M+1) requires 332.1417]; Major isomer:  $^1H$  NMR (400 MHz,  $CDCl_3$ )  $\delta$  7.09 (t,  $J = 10.7$  Hz, 2H), 6.93 (d,  $J = 8.9$  Hz, 2H), 6.76 (dd,  $J = 8.5, 4.9$  Hz, 2H), 6.34 (t,  $J = 6.0$  Hz, 2H), 4.47 (s, 1H), 4.31 (s, 1H), 3.70 (d,  $J = 3.5$  Hz, 3H), 2.98 – 2.82 (m, 1H), 2.36 – 2.12 (m, 2H), 1.03 (d,  $J = 7.0$  Hz, 3H), 0.86 (t,  $J = 7.2$  Hz, 3H);  $^{13}C$  NMR (101 MHz,  $CDCl_3$ )  $\delta$  212.46, 157.71, 146.08, 132.13, 128.01, 126.87, 116.54, 112.95, 112.63, 57.73, 54.18, 51.38, 34.58, 10.79, 6.48

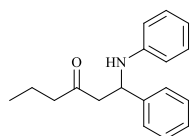

**4y**

**1-phenyl-1-(phenylamino)-3-hexanone (4y):** Yield, 77%; white solid; mp 87-88 °C; Rf 0.51 (hexane/ethyl acetate = 4:1); IR (KBr): 3376, 1703; HRMS (ESI)  $m/z$  268.1689 [ $C_{18}H_{21}NO$  (M+1) requires 268.1701];  $\delta_H$  (400 MHz,  $CDCl_3$ ) 7.29 (d,  $J = 7.9$  Hz, 2H), 7.23 (d,  $J = 7.5$  Hz, 2H), 7.17 (d,  $J = 5.8$  Hz, 1H), 7.02 (t,  $J = 7.6$  Hz, 2H), 6.59 (t,  $J = 7.3$  Hz, 1H), 6.48 (d,  $J = 7.8$  Hz, 2H), 4.78 (t,  $J = 6.4$  Hz, 1H), 4.48 (s, 1H), 2.82 (d,  $J = 6.4$  Hz, 2H), 2.28-2.17 (m, 2H), 1.51-1.41 (m, 2H), 0.76 (t,  $J = 7.4$  Hz, 3H);  $\delta_C$  (101 MHz,  $CDCl_3$ ) 208.4, 145.8, 141.6, 128.1, 127.7, 126.3, 125.3, 116.7, 112.7, 53.4, 49.2, 44.6, 15.8, 12.5.

## 6. ESI mass spectra

### Acquisition Parameter

|             |            |                       |          |                  |           |
|-------------|------------|-----------------------|----------|------------------|-----------|
| Source Type | ESI        | Ion Polarity          | Positive | Set Nebulizer    | 0.4 Bar   |
| Focus       | Not active | Set Capillary         | 4500 V   | Set Dry Heater   | 180 °C    |
| Scan Begin  | 100 m/z    | Set End Plate Offset  | -500 V   | Set Dry Gas      | 4.0 l/min |
| Scan End    | 1000 m/z   | Set Collision Cell RF | 80.0 Vpp | Set Divert Valve | Waste     |

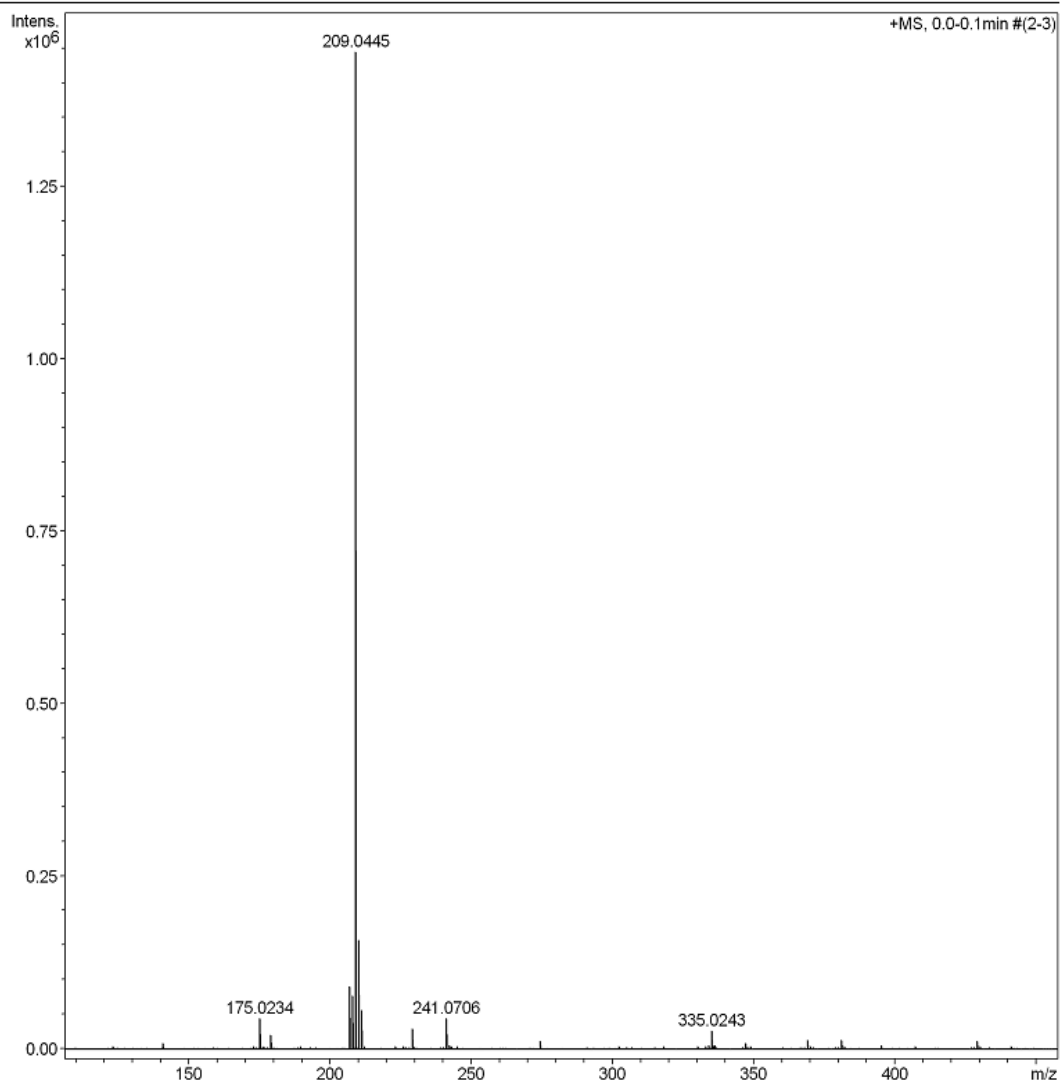

Figure S2: ESI(+)-MS for CID of Cp<sub>2</sub>TiCl<sub>2</sub> in CH<sub>3</sub>OH solution (m/z 100-450).

**Acquisition Parameter**

|             |            |                       |          |                  |           |
|-------------|------------|-----------------------|----------|------------------|-----------|
| Source Type | ESI        | Ion Polarity          | Positive | Set Nebulizer    | 0.4 Bar   |
| Focus       | Not active | Set Capillary         | 4500 V   | Set Dry Heater   | 180 °C    |
| Scan Begin  | 100 m/z    | Set End Plate Offset  | -500 V   | Set Dry Gas      | 4.0 l/min |
| Scan End    | 1000 m/z   | Set Collision Cell RF | 80.0 Vpp | Set Divert Valve | Waste     |

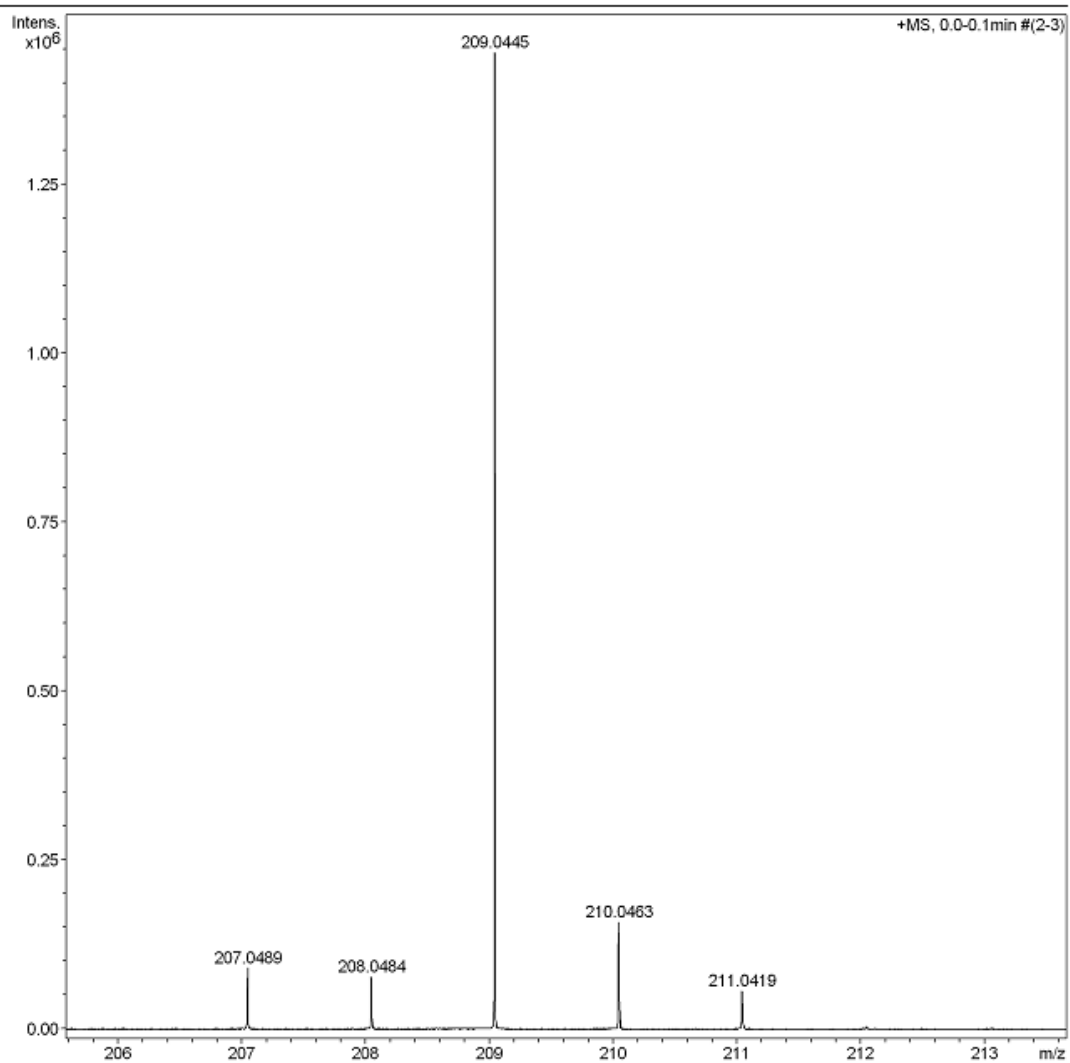

Figure S3: ESI(+)-MS for CID of Cp<sub>2</sub>TiCl<sub>2</sub> in CH<sub>3</sub>OH (m/z 206-213).



**Acquisition Parameter**

|             |            |                       |          |                  |           |
|-------------|------------|-----------------------|----------|------------------|-----------|
| Source Type | ESI        | Ion Polarity          | Positive | Set Nebulizer    | 0.4 Bar   |
| Focus       | Not active | Set Capillary         | 4500 V   | Set Dry Heater   | 180 °C    |
| Scan Begin  | 100 m/z    | Set End Plate Offset  | -500 V   | Set Dry Gas      | 4.0 l/min |
| Scan End    | 1000 m/z   | Set Collision Cell RF | 80.0 Vpp | Set Divert Valve | Waste     |

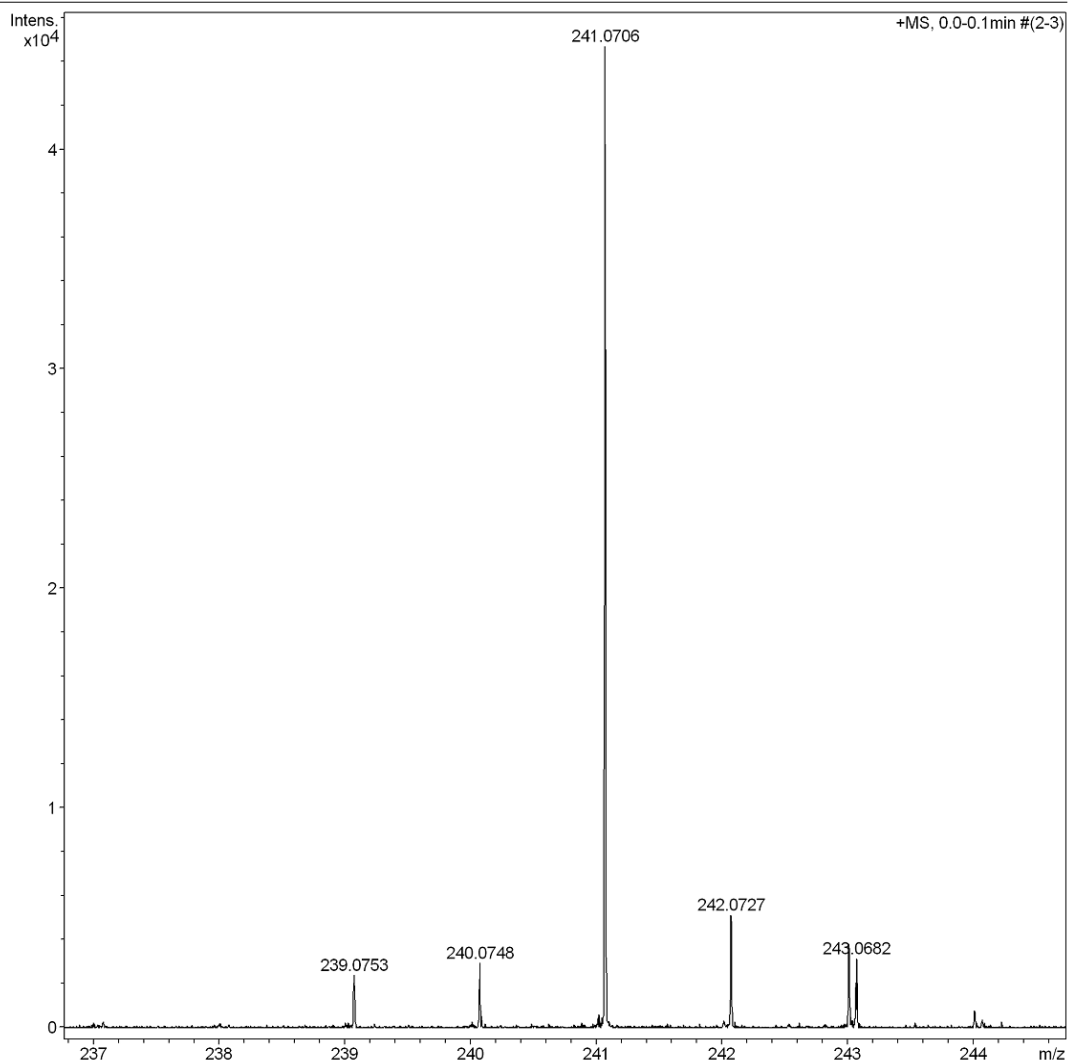

Figure S4: ESI(+)-MS for CID of Cp<sub>2</sub>TiCl<sub>2</sub> in CH<sub>3</sub>OH(m/z 237-244).

## 7. Copies of $^1\text{H}$ NMR and $^{13}\text{C}$ NMR spectra

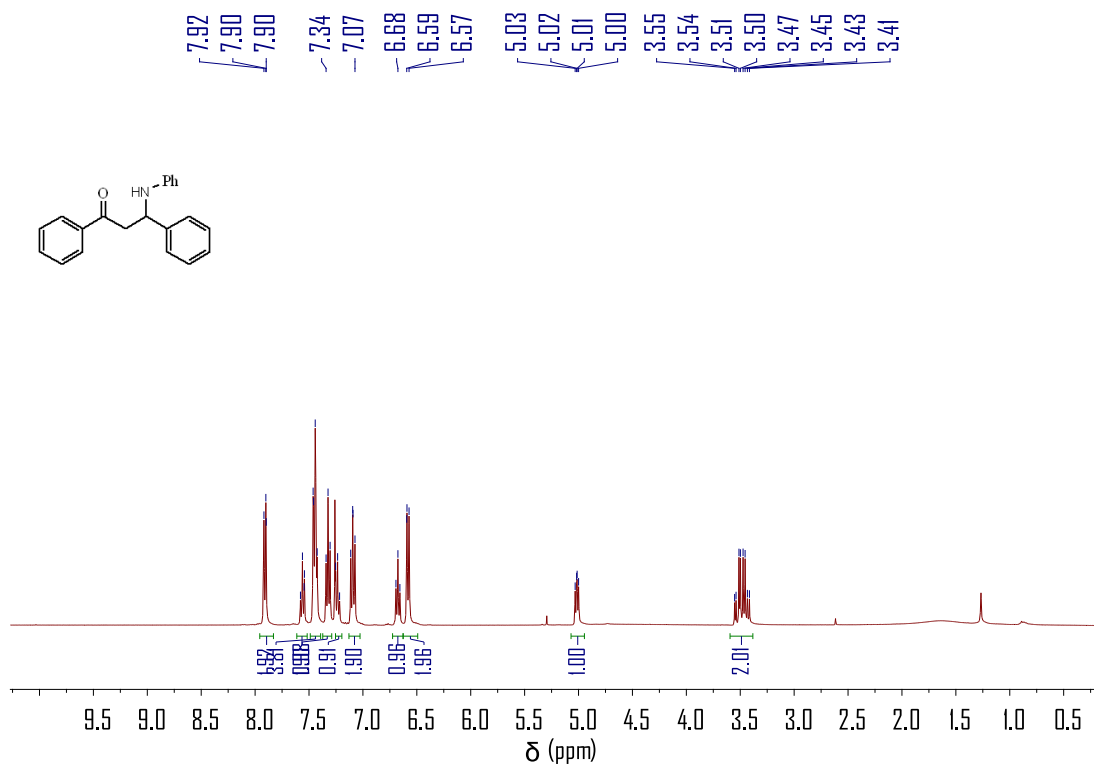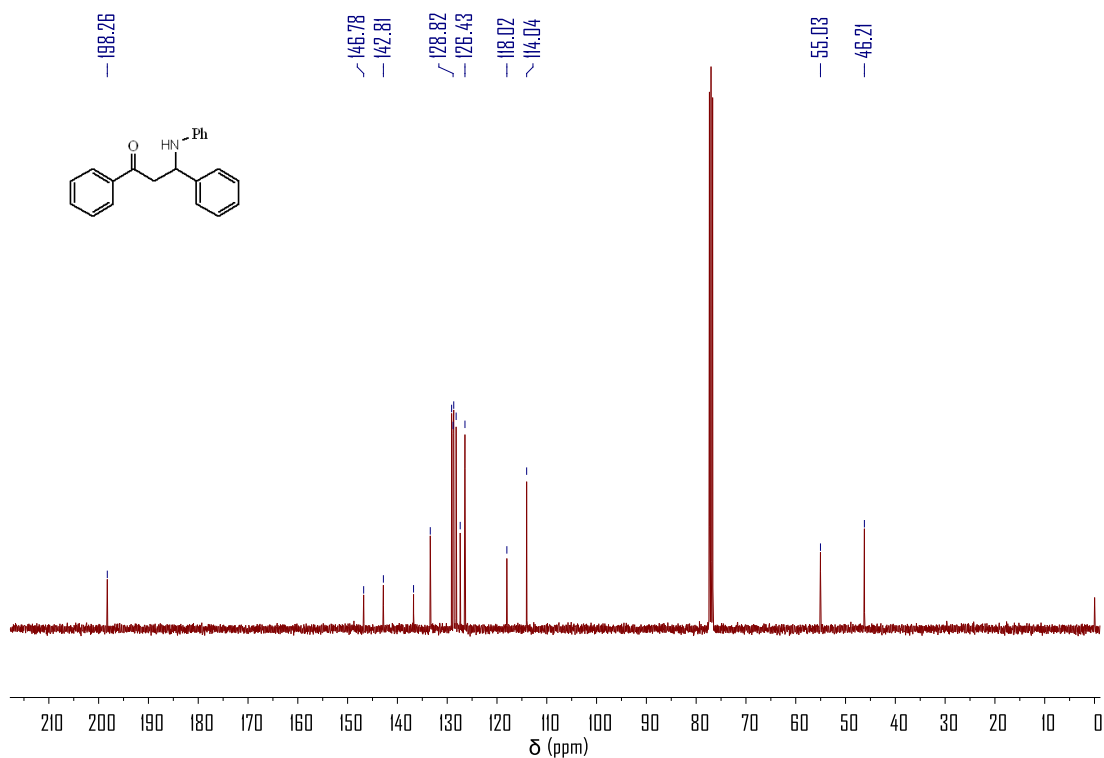

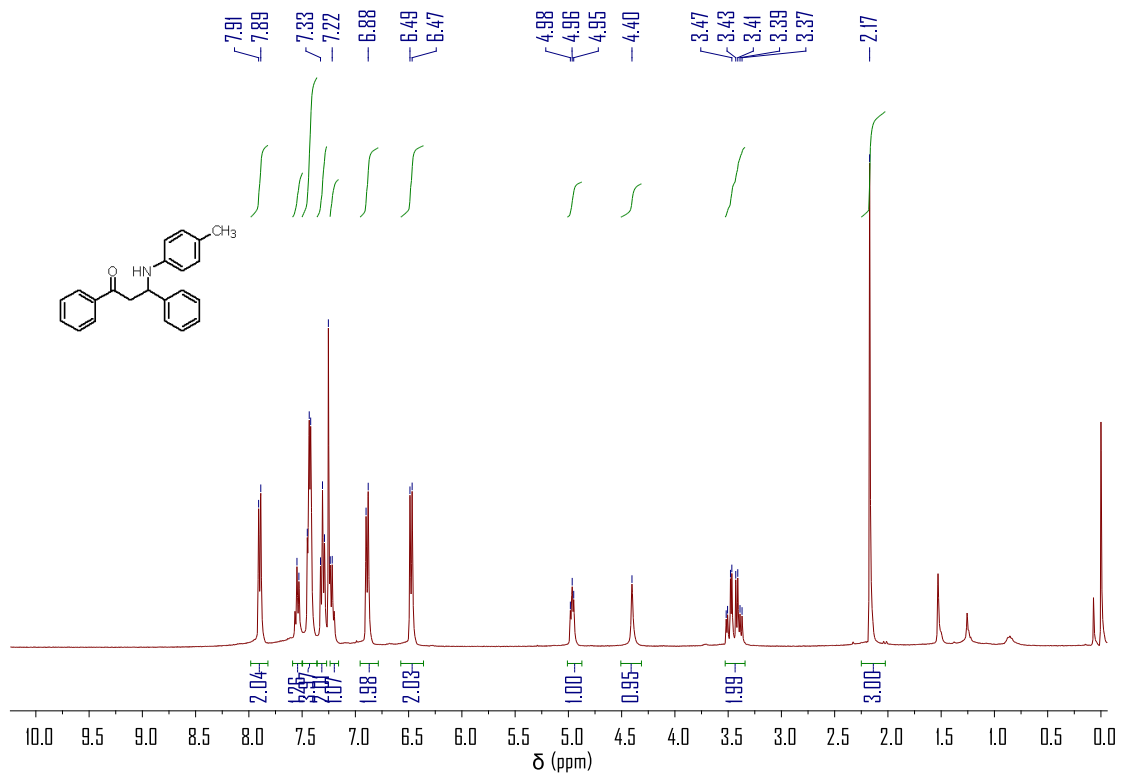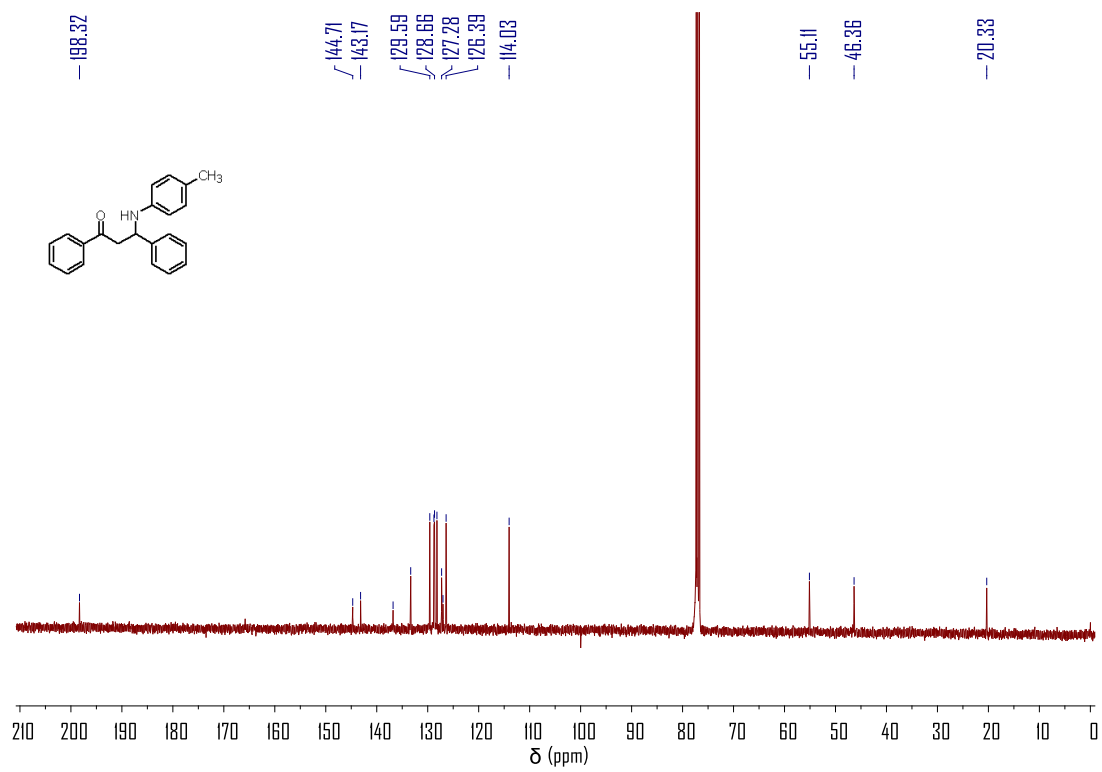

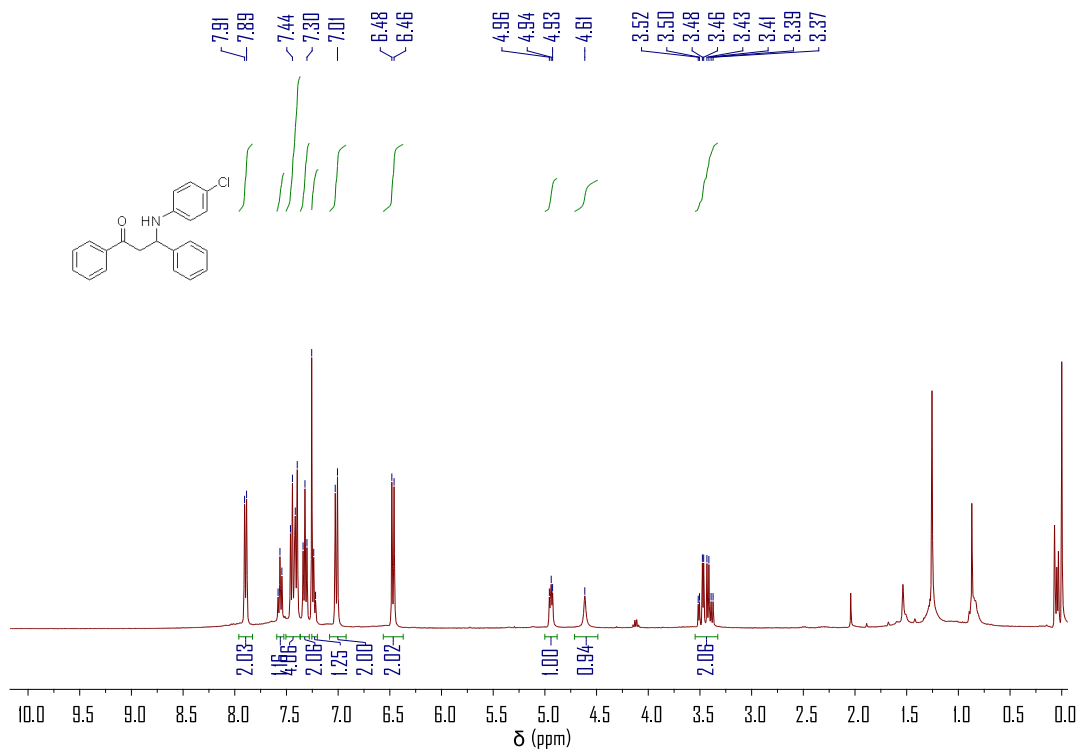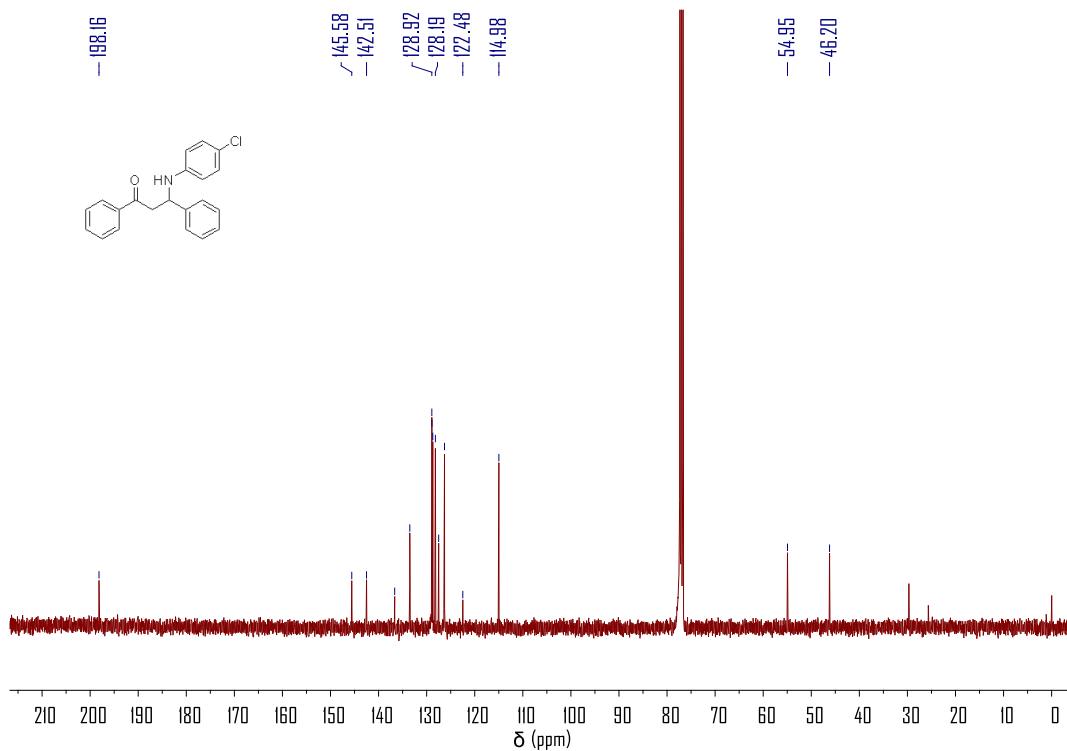

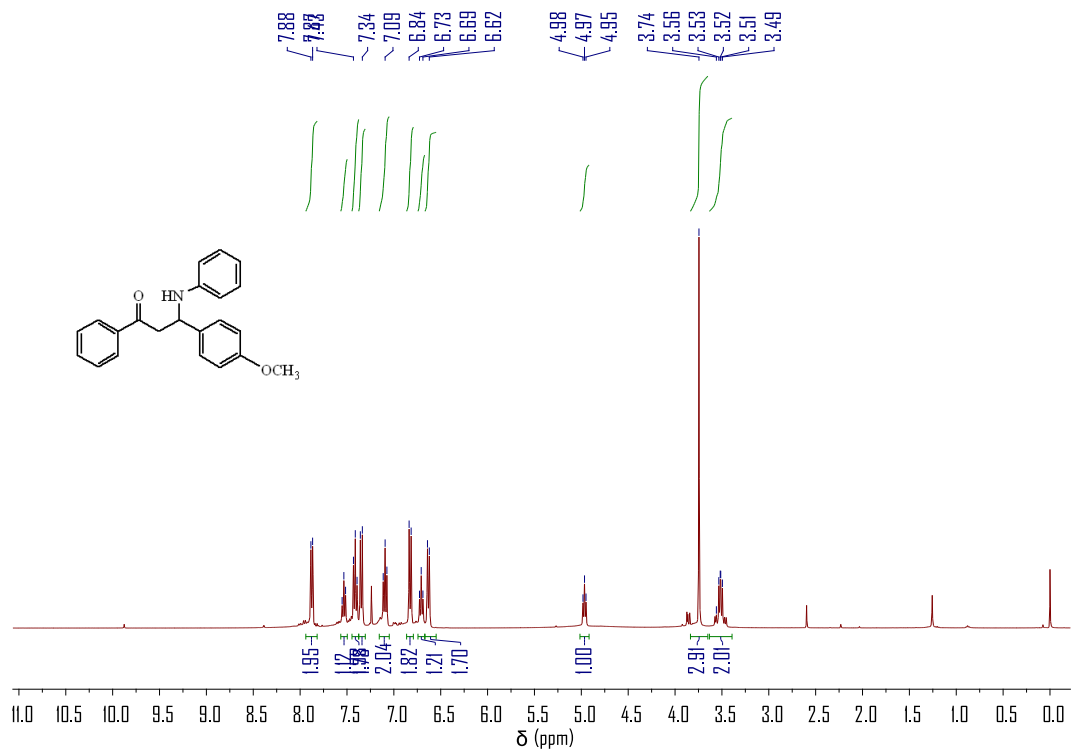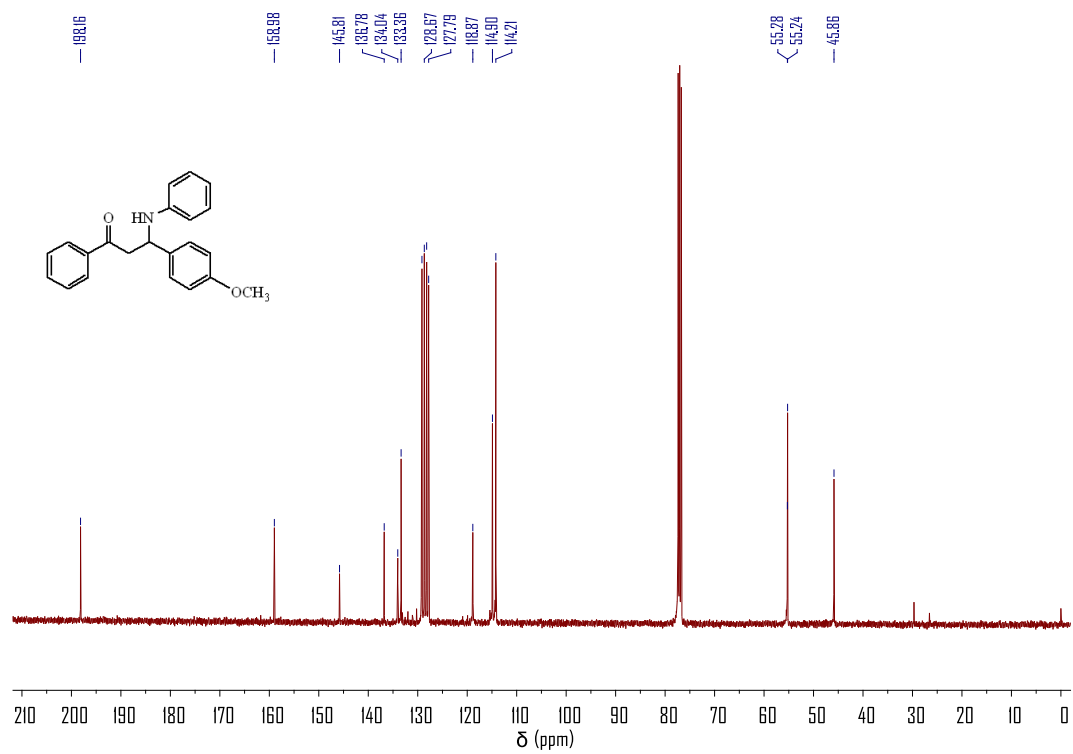

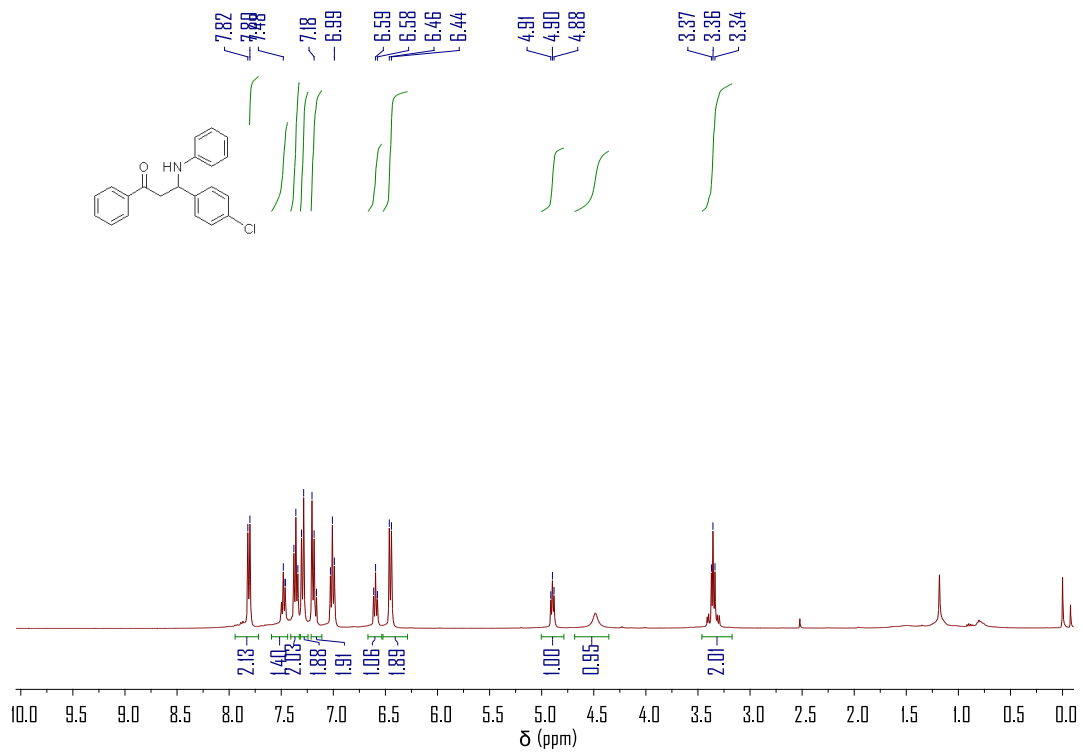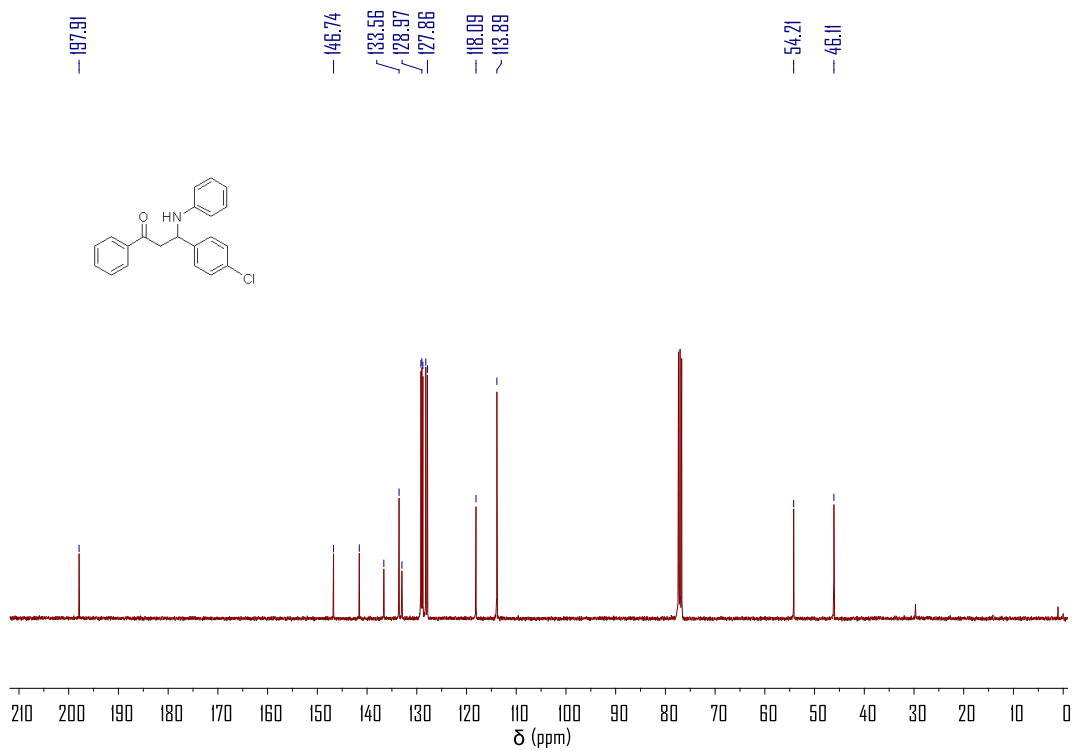

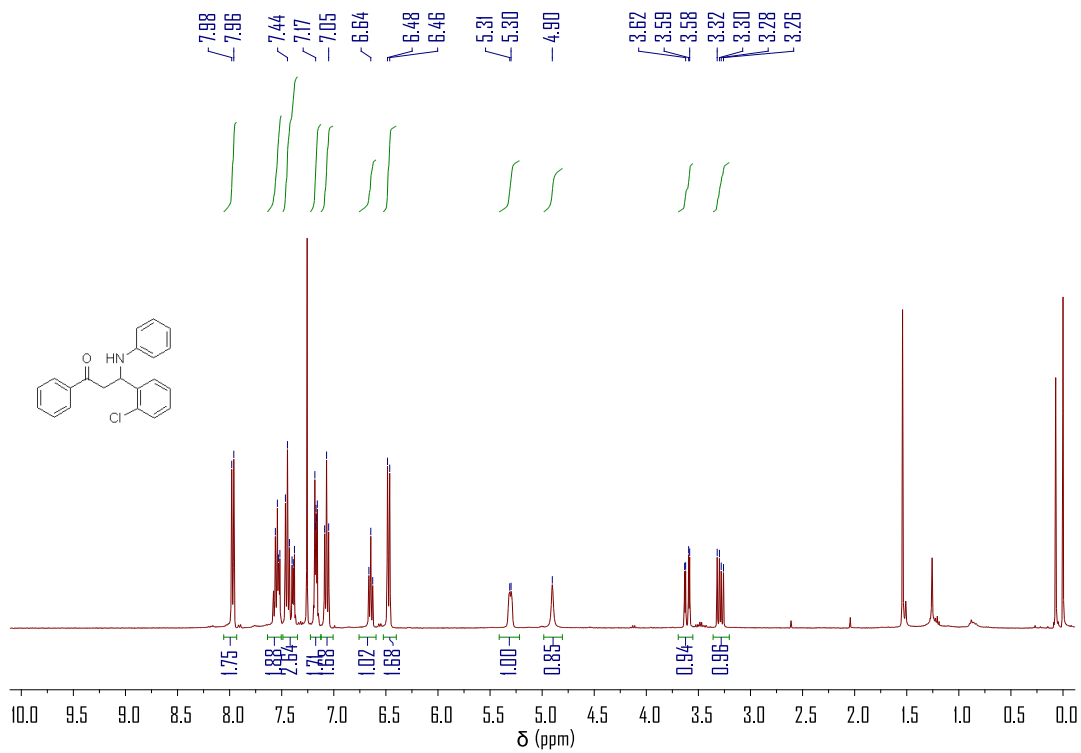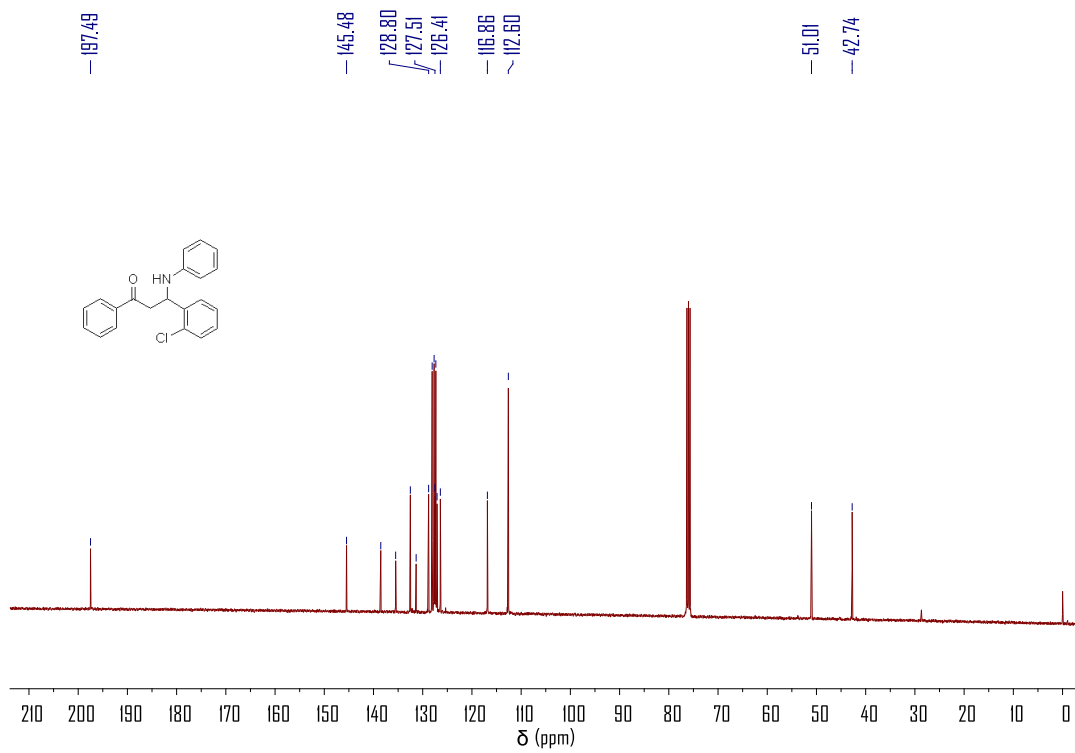

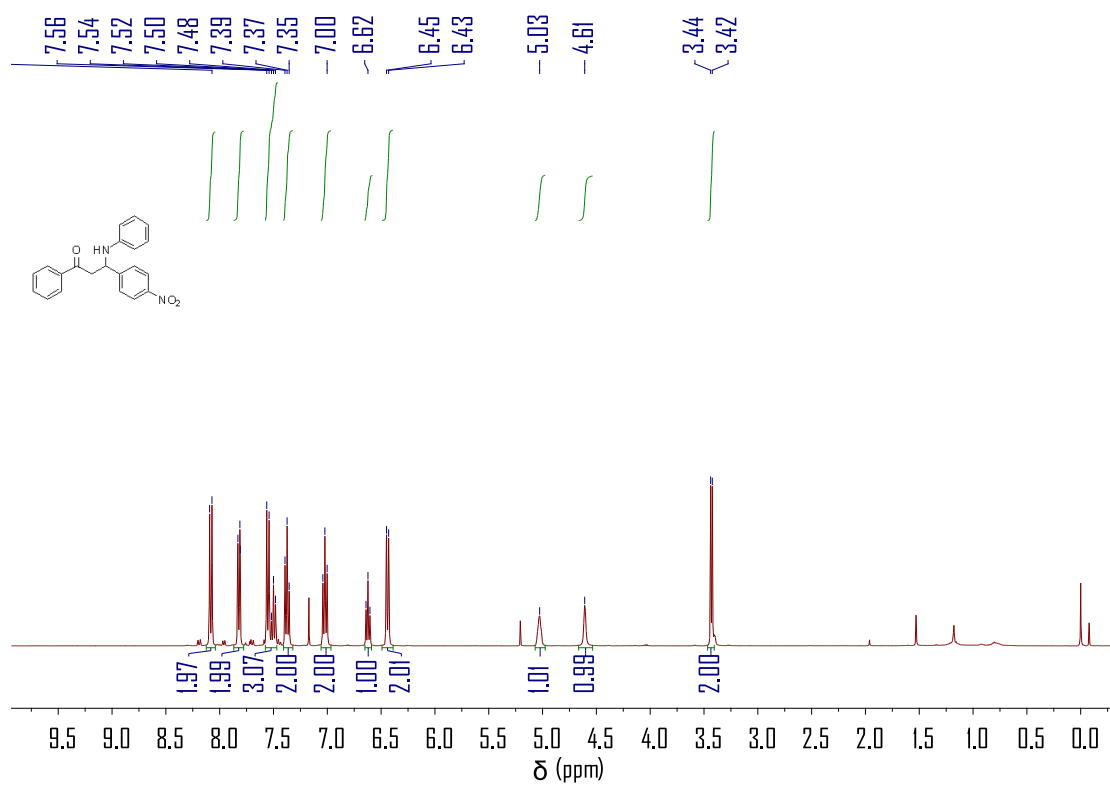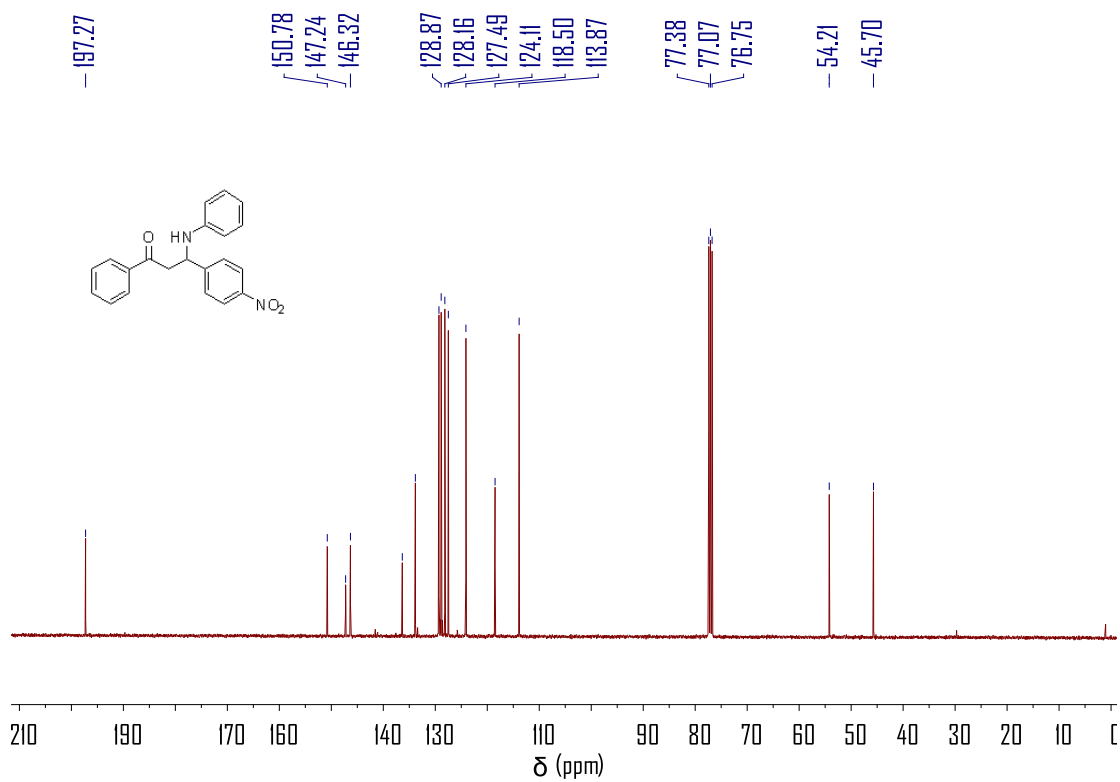



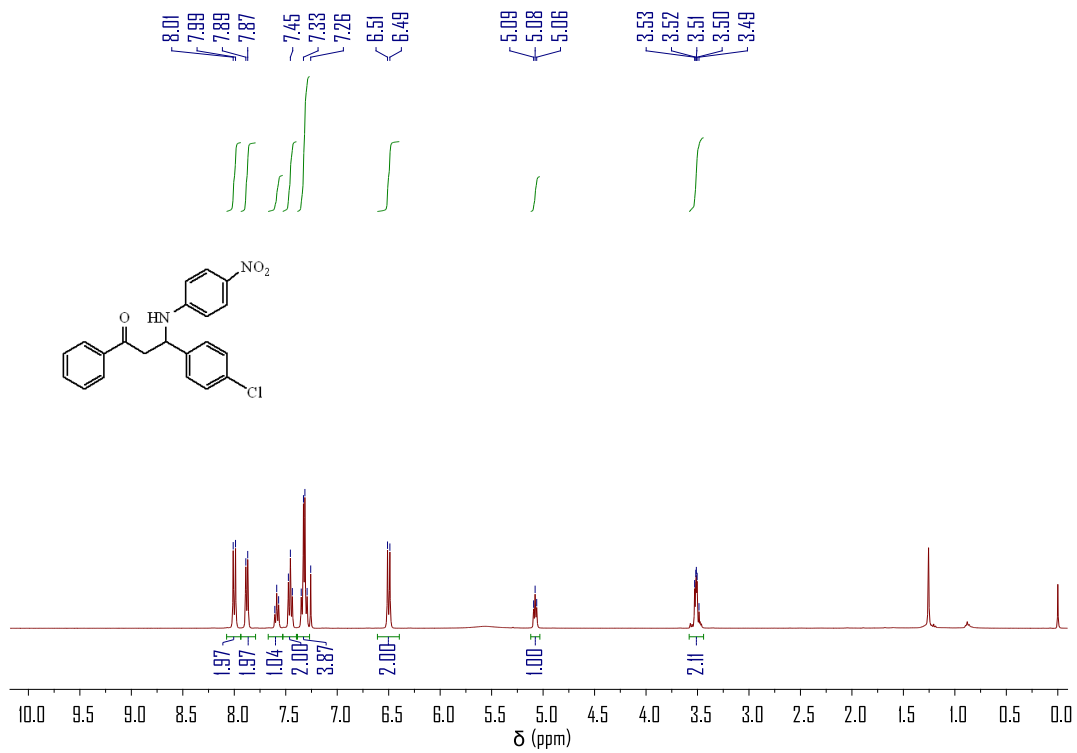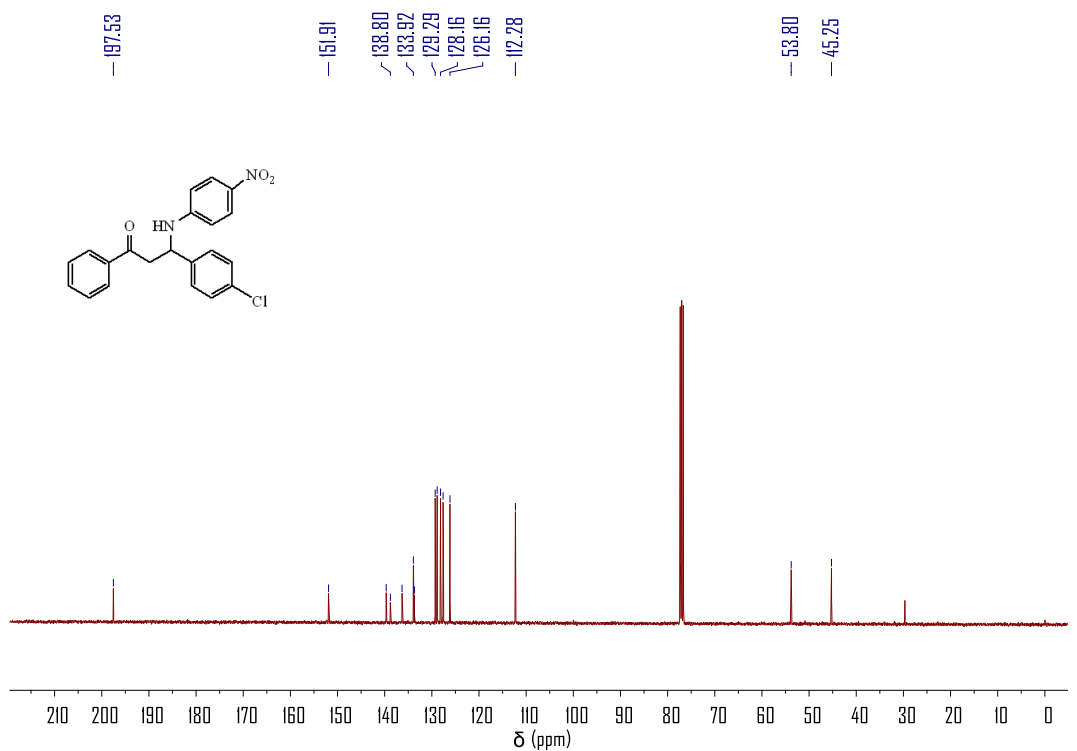

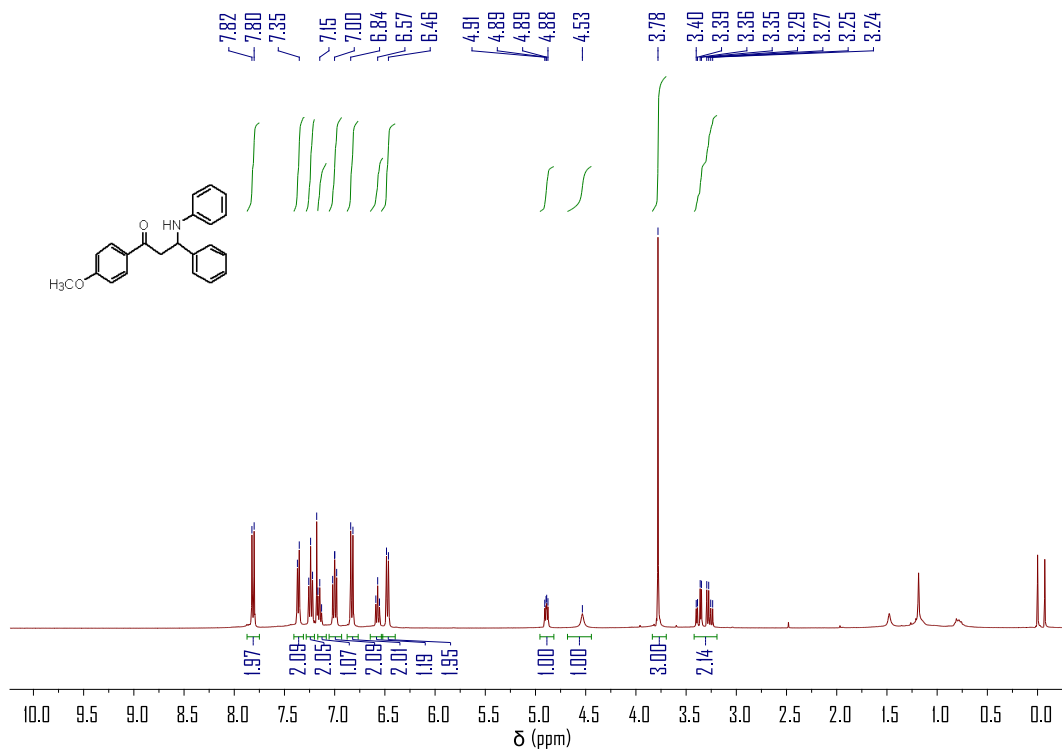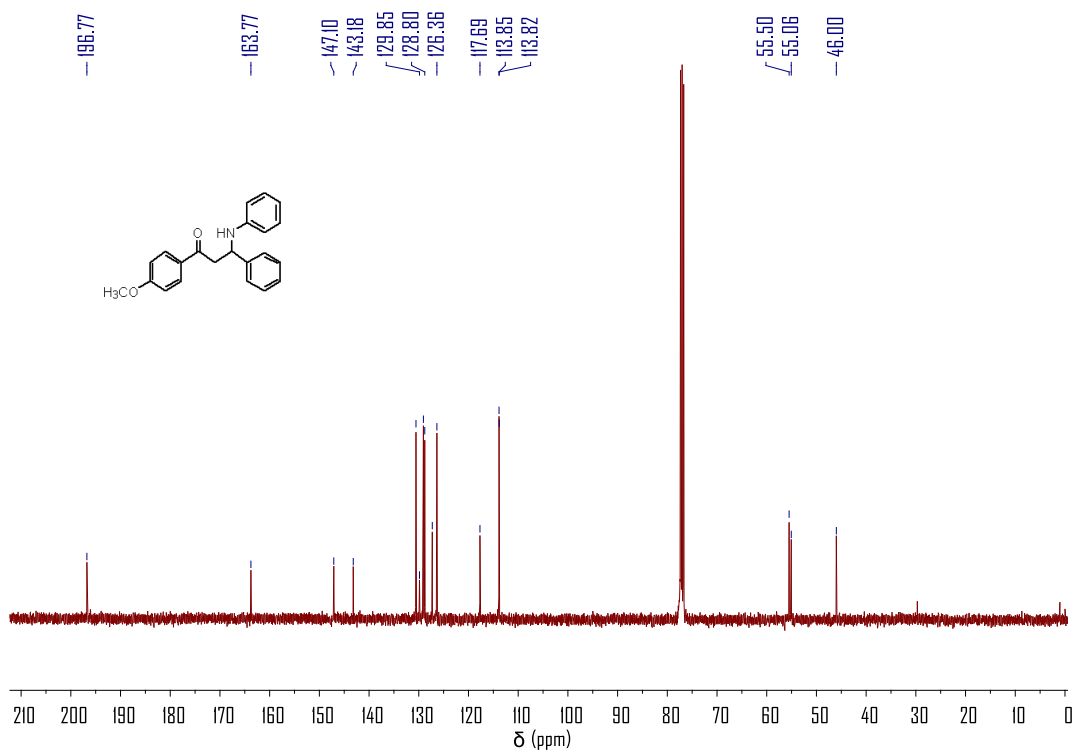

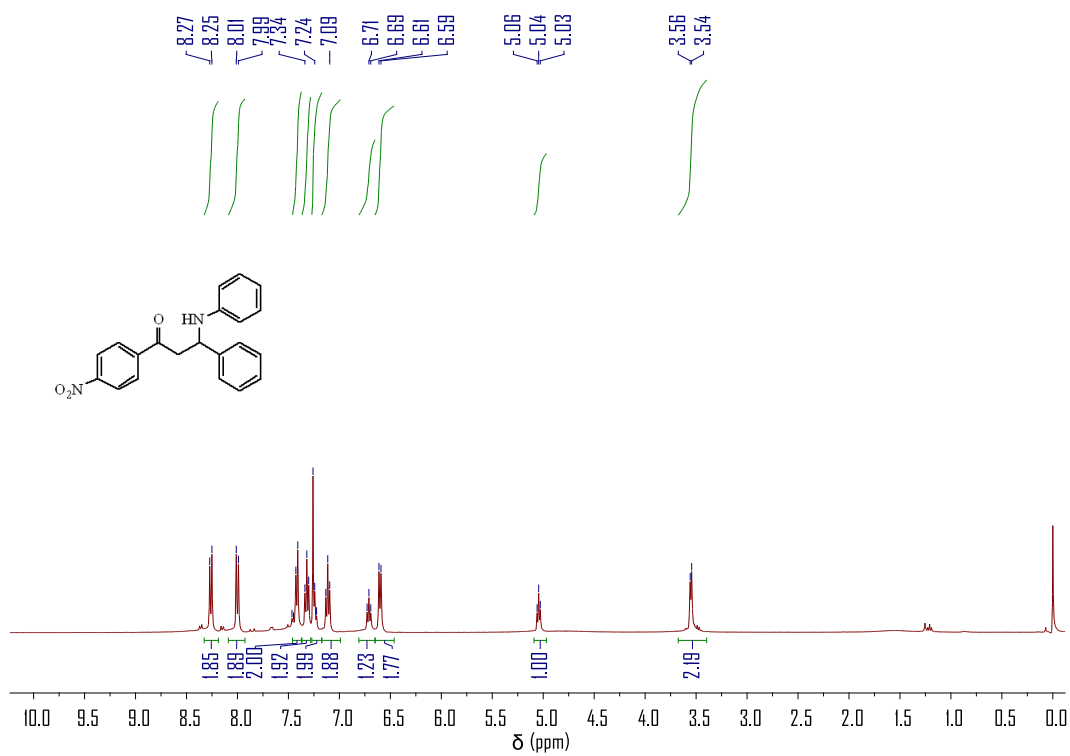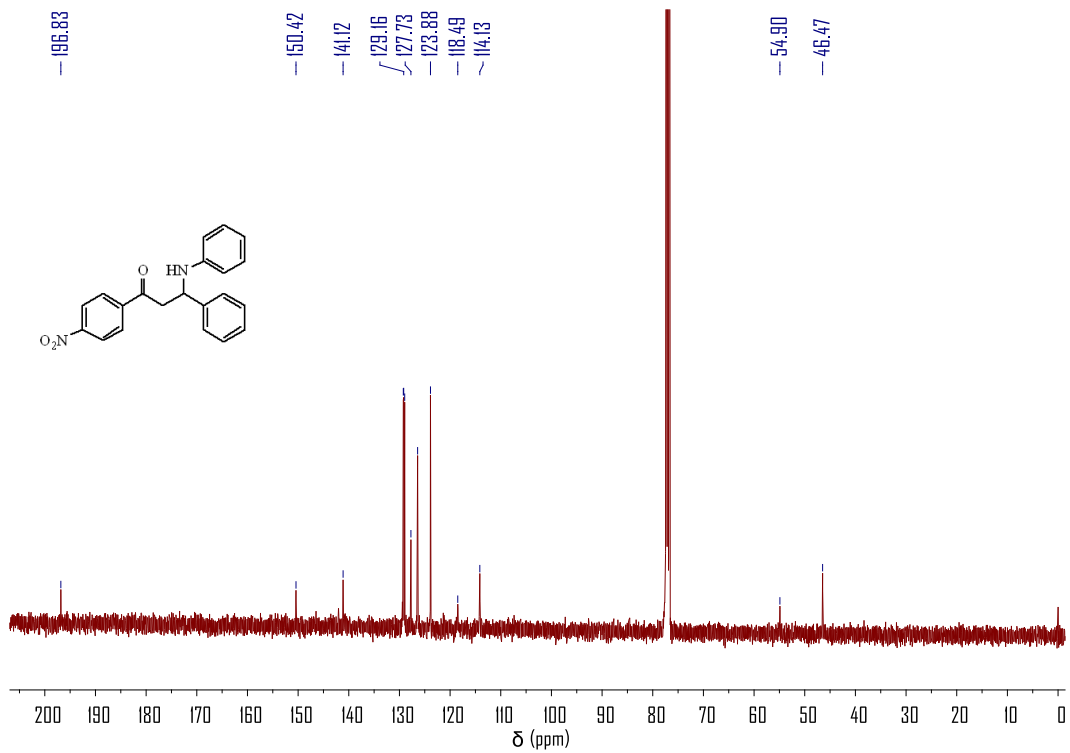

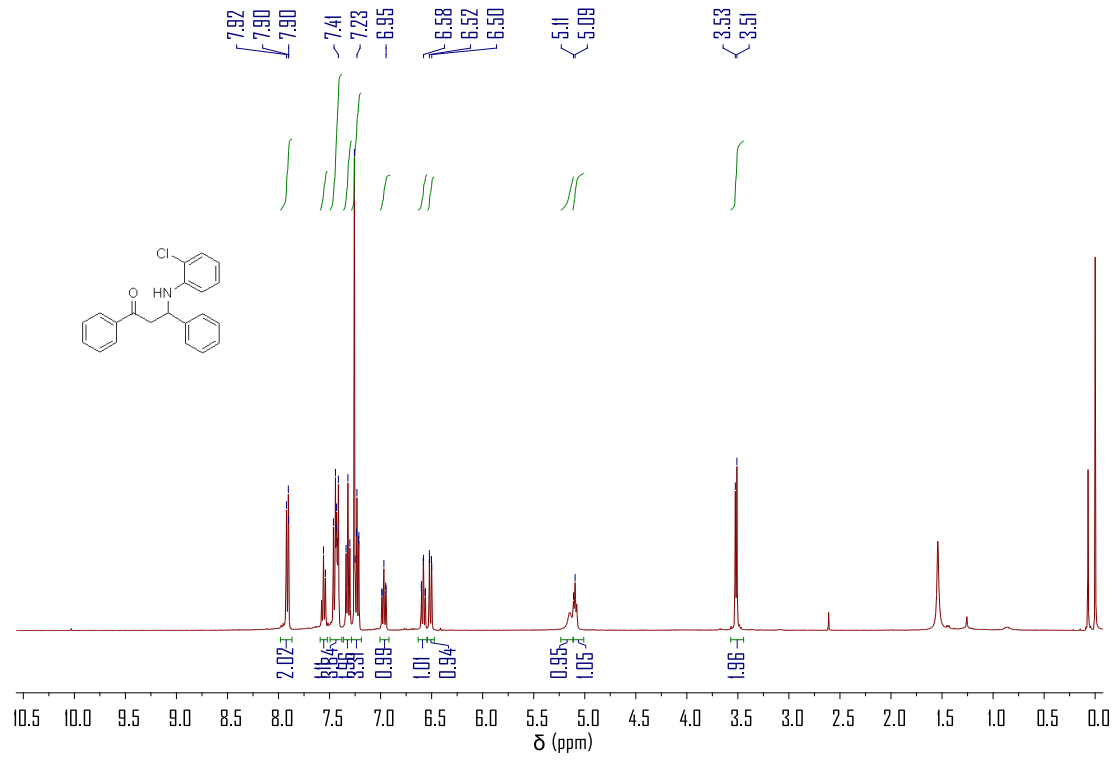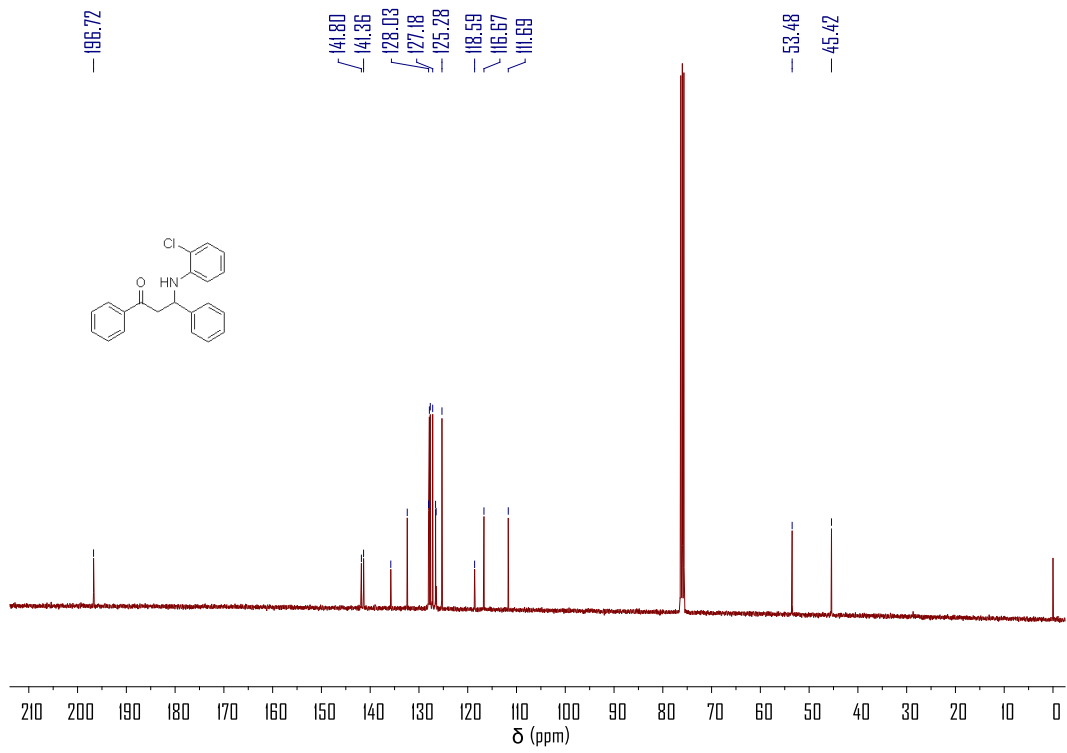

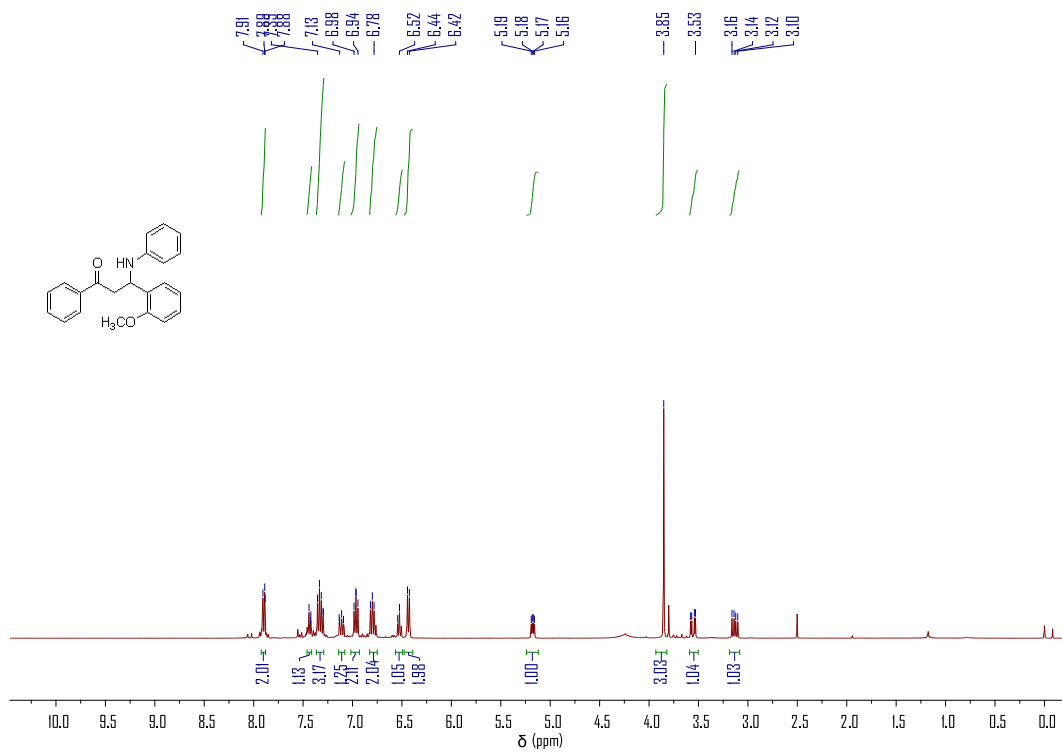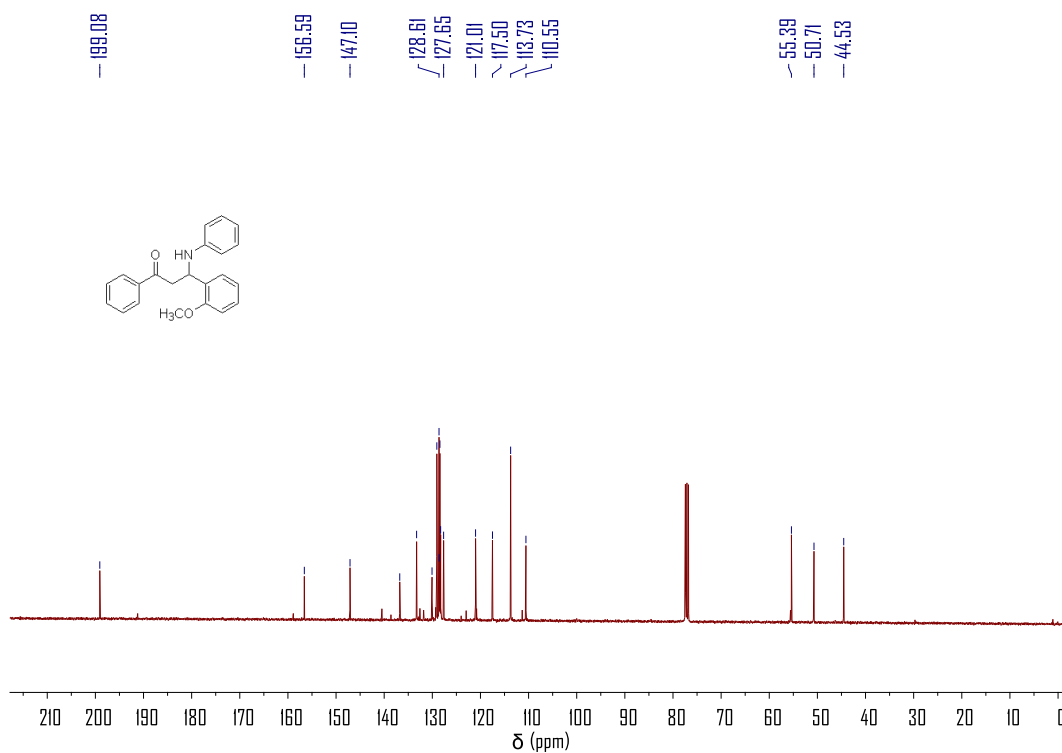

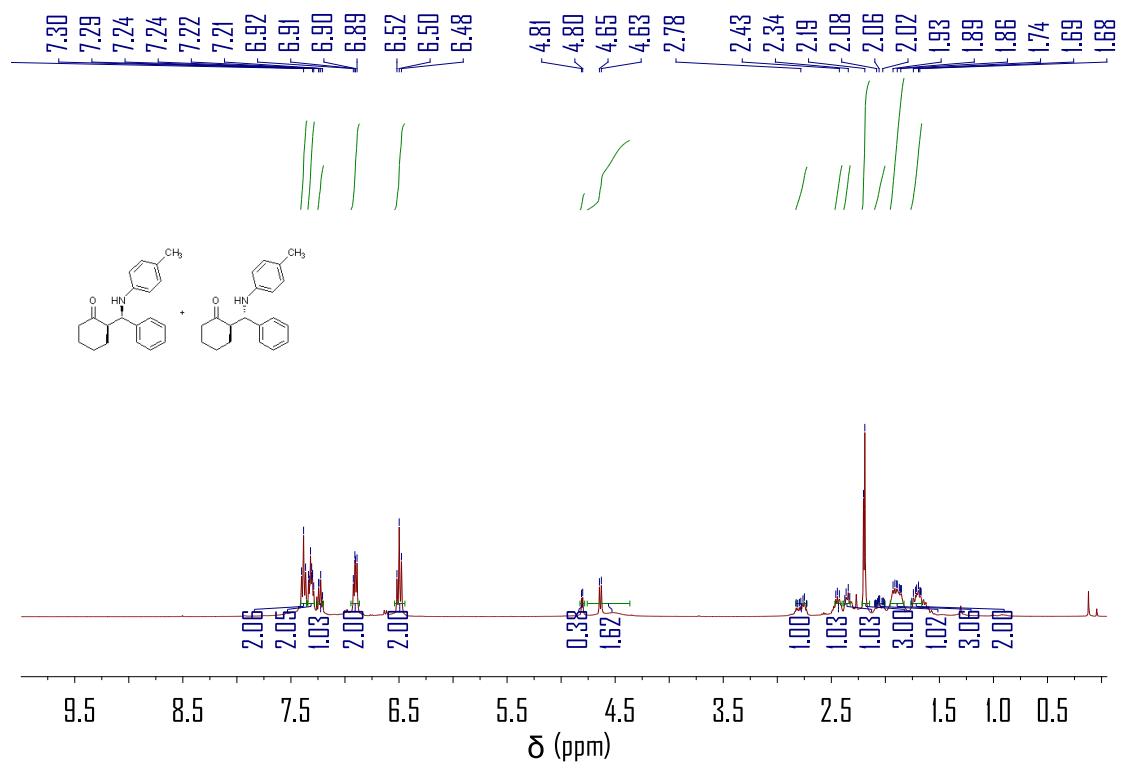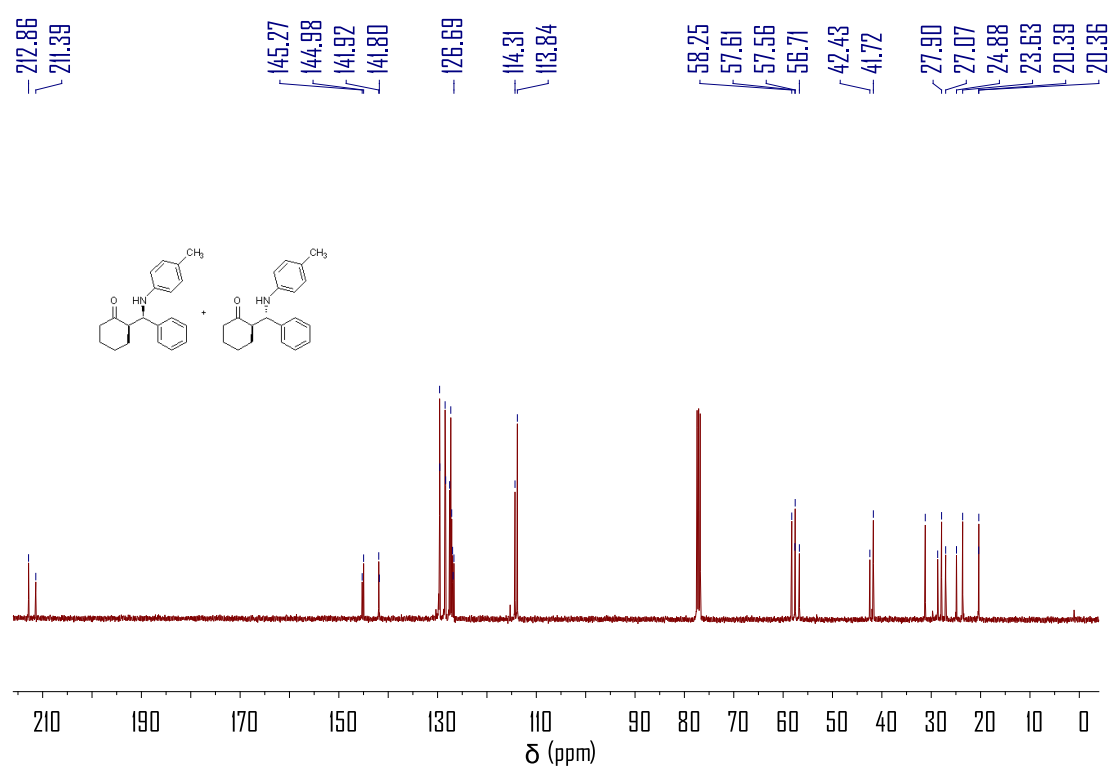

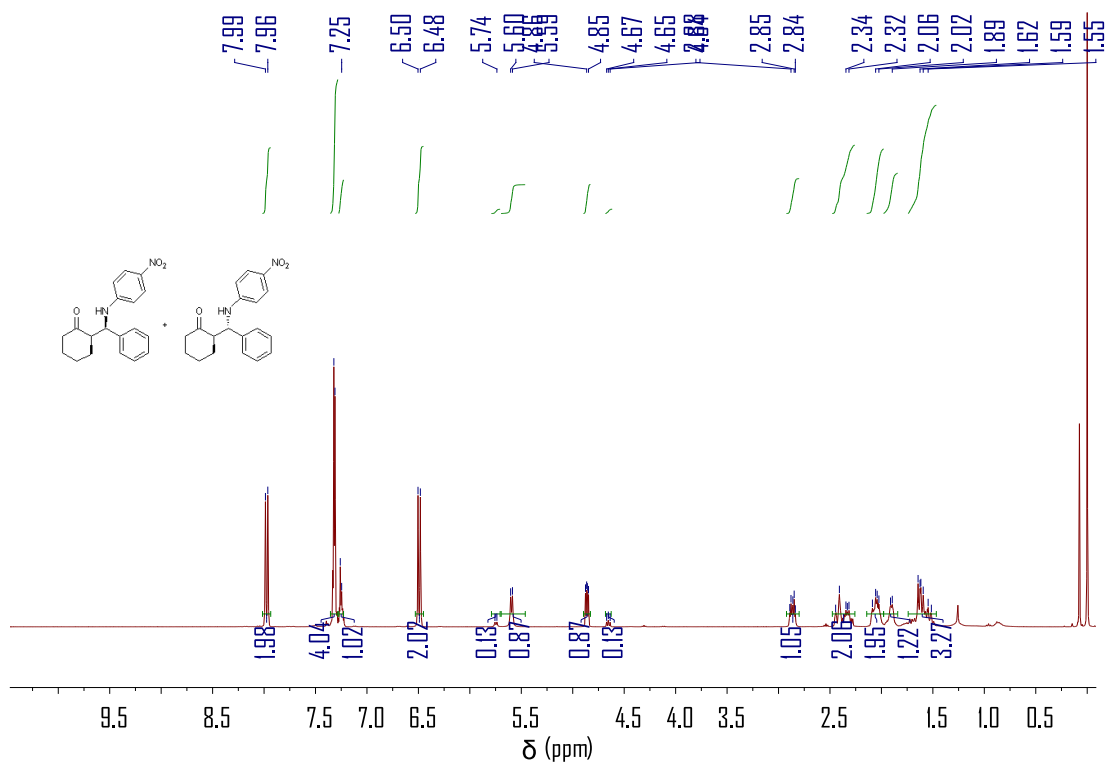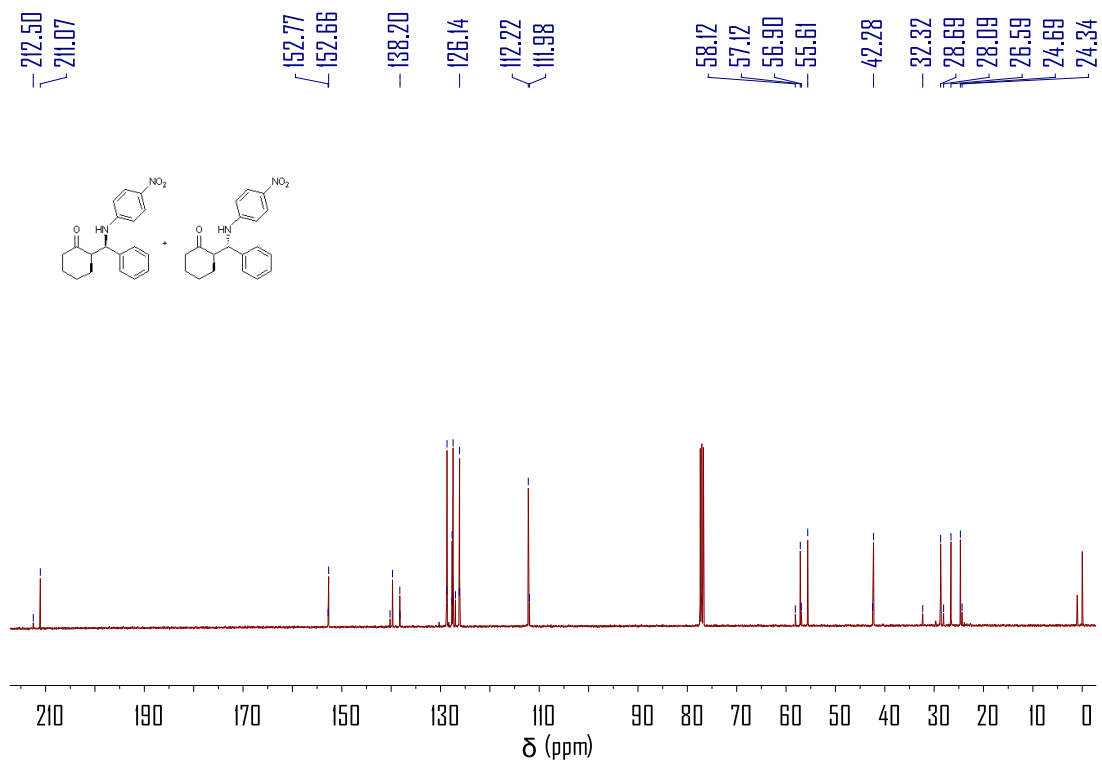

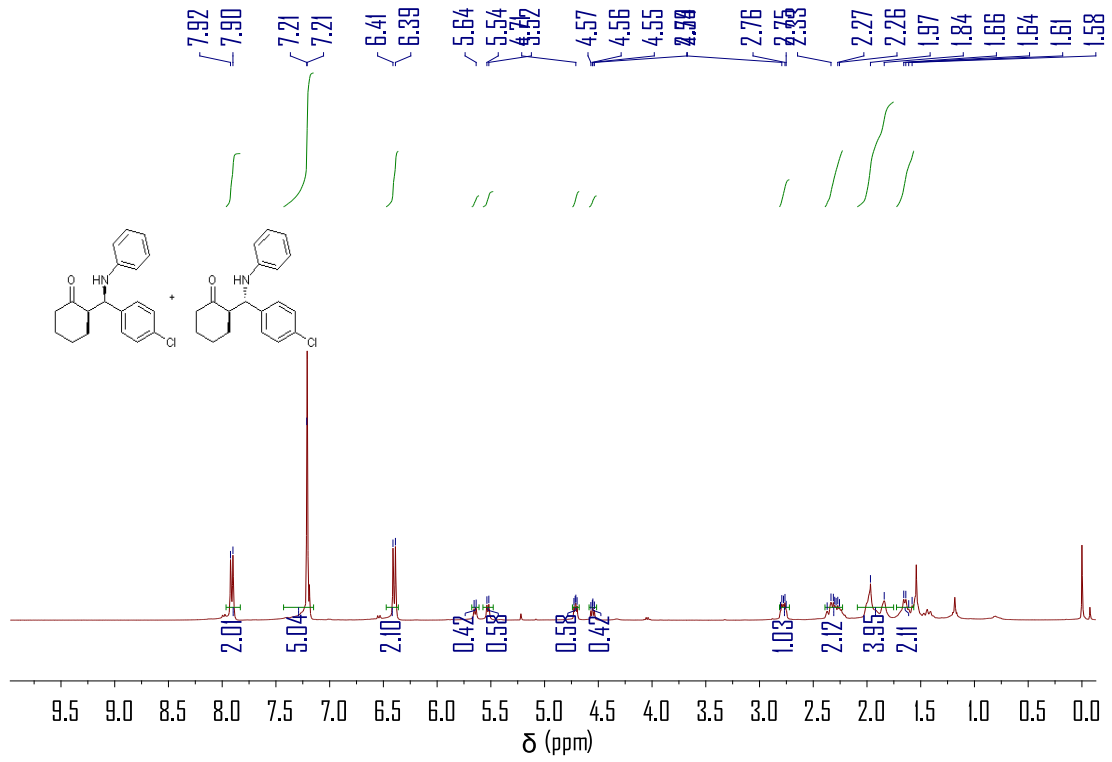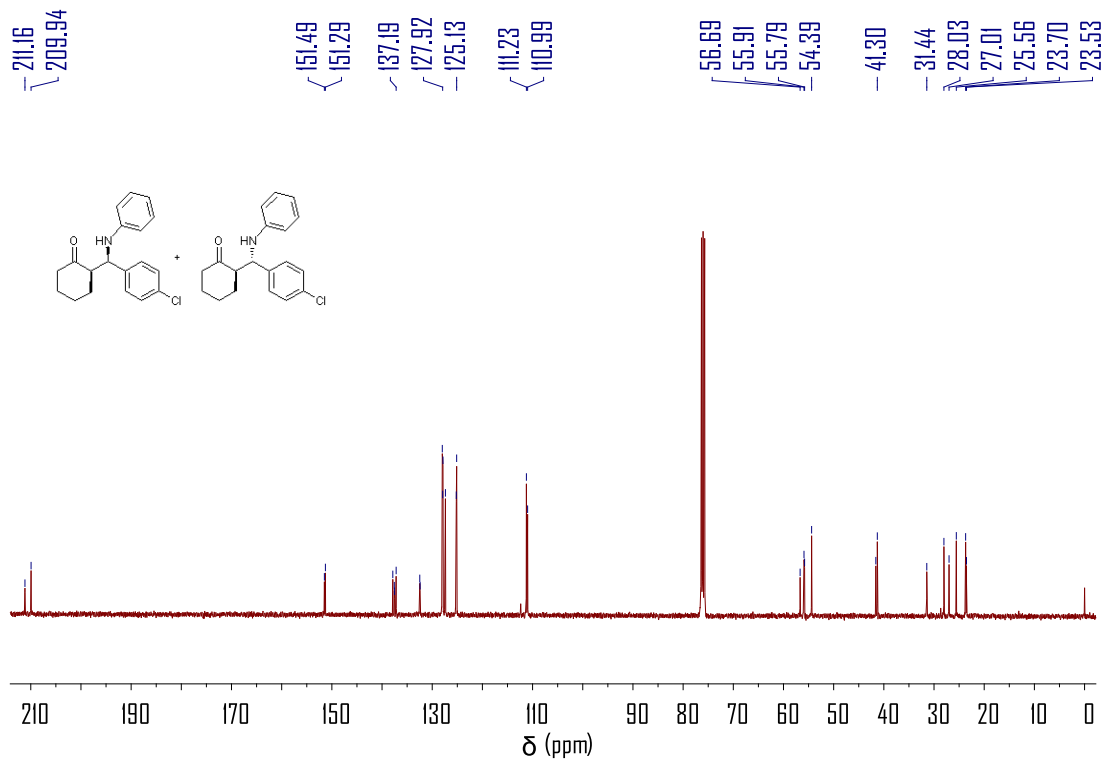



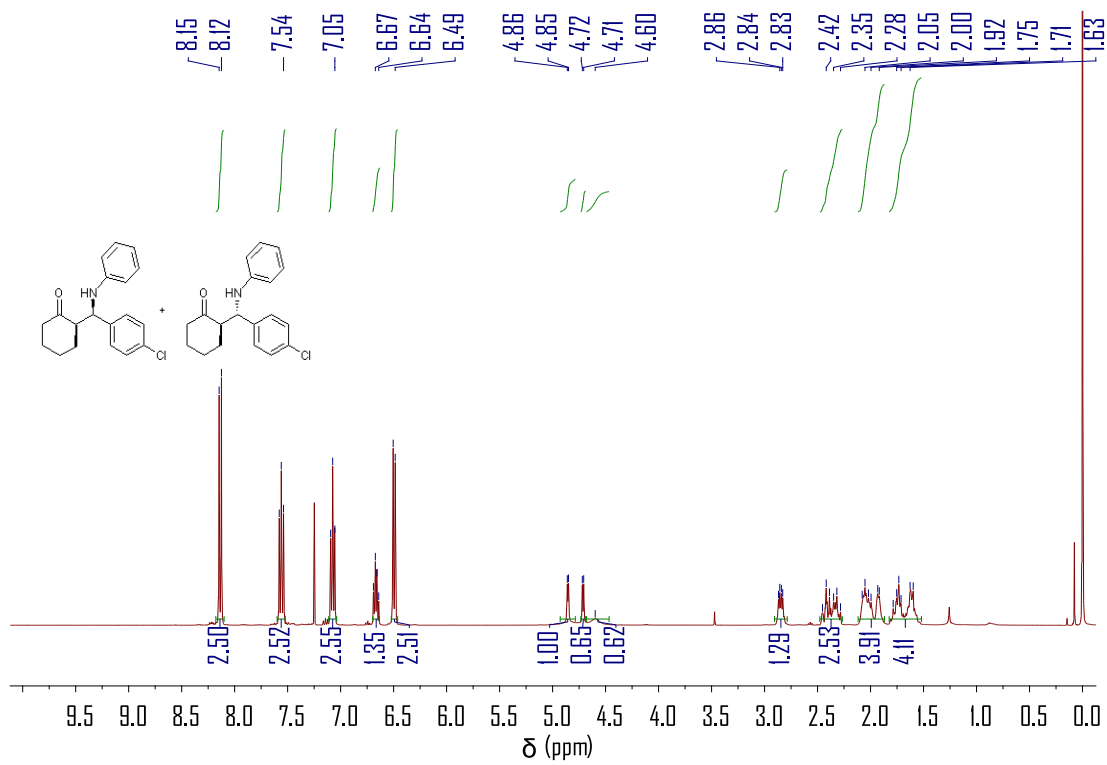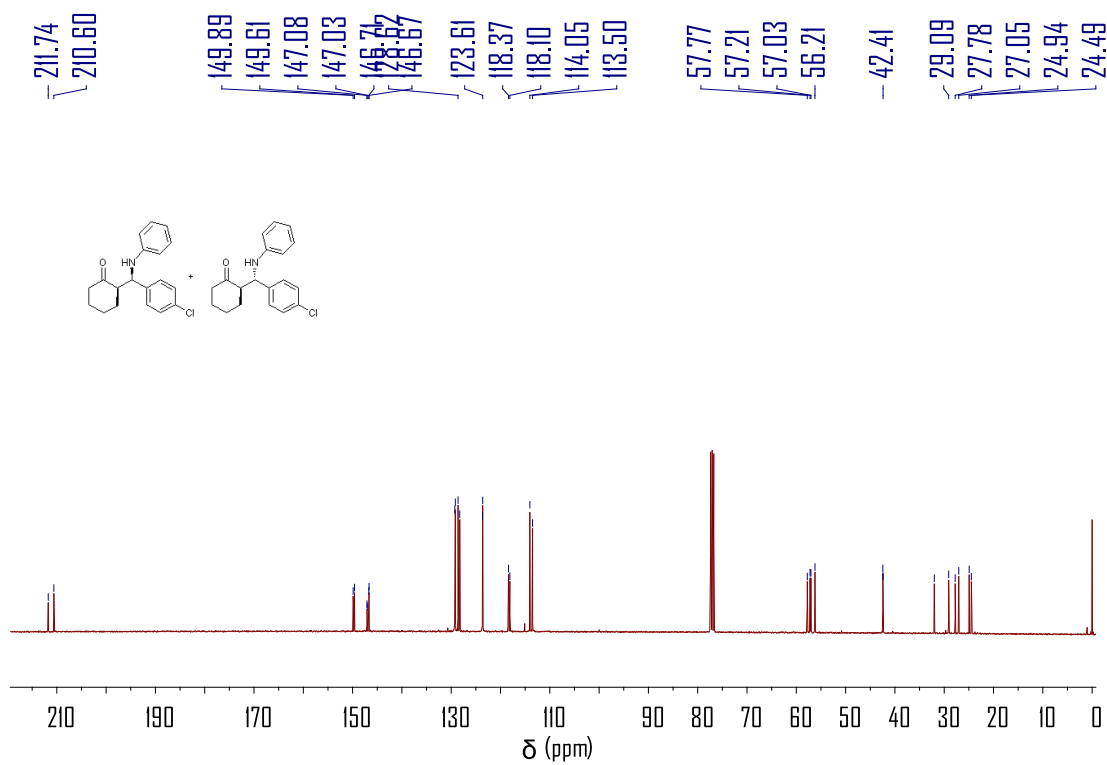

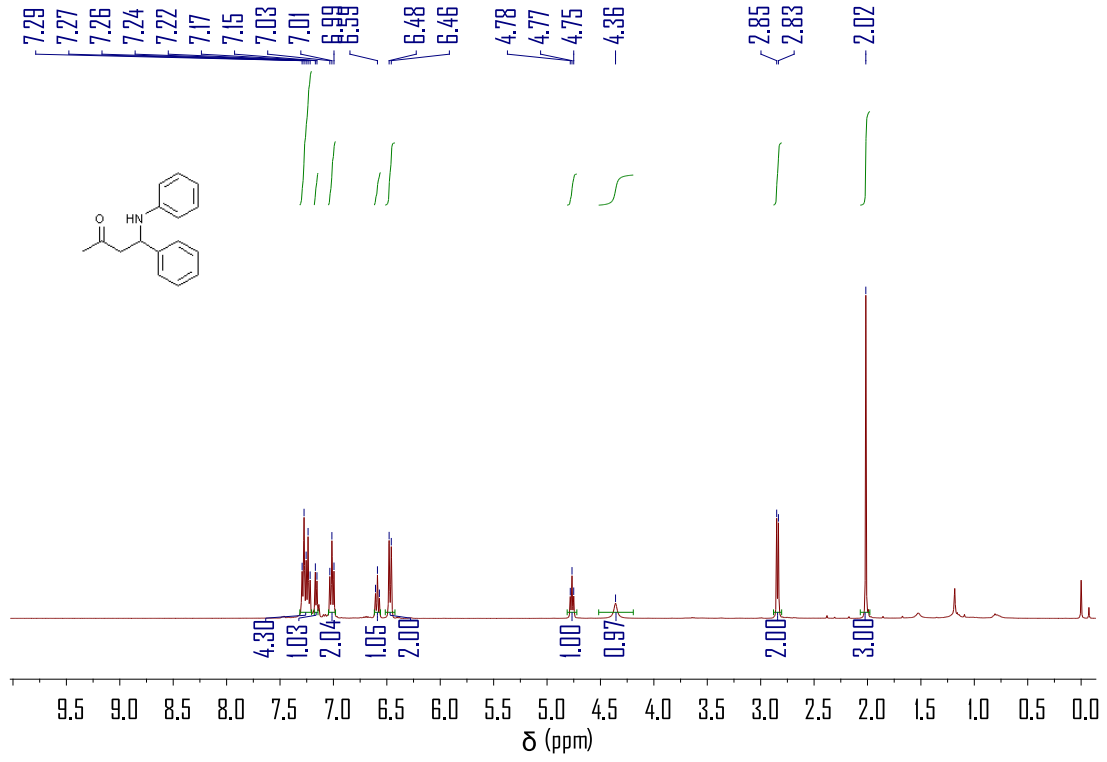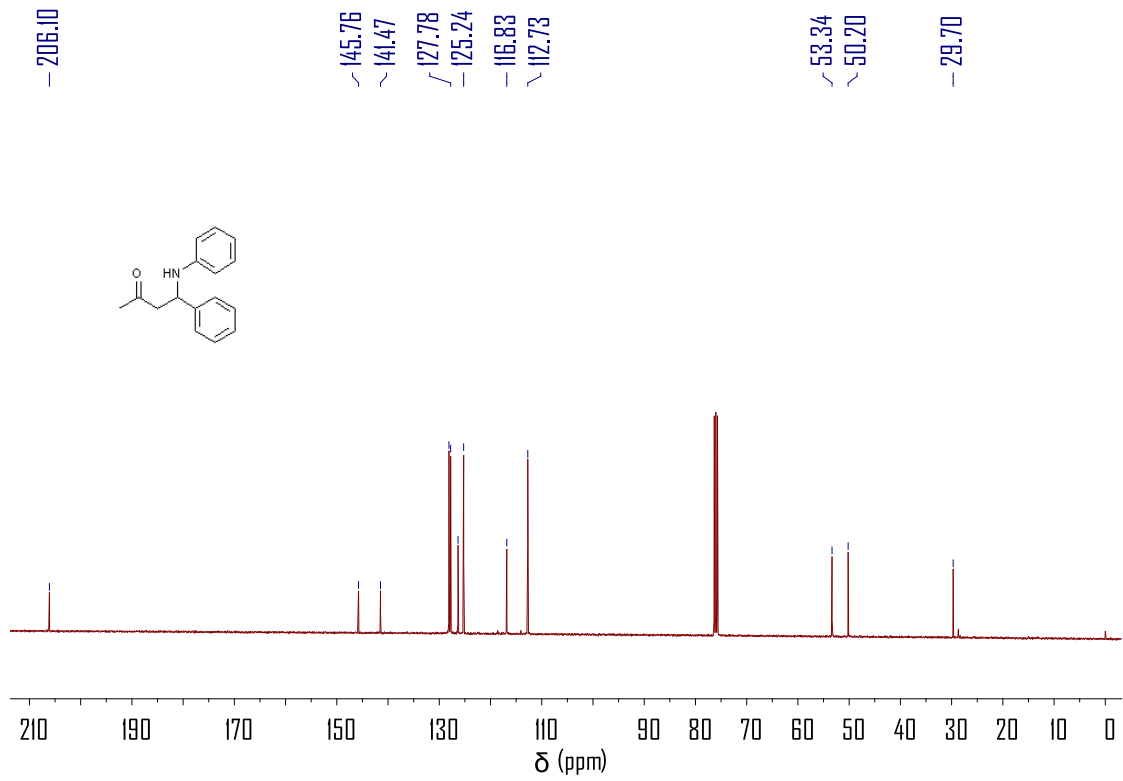

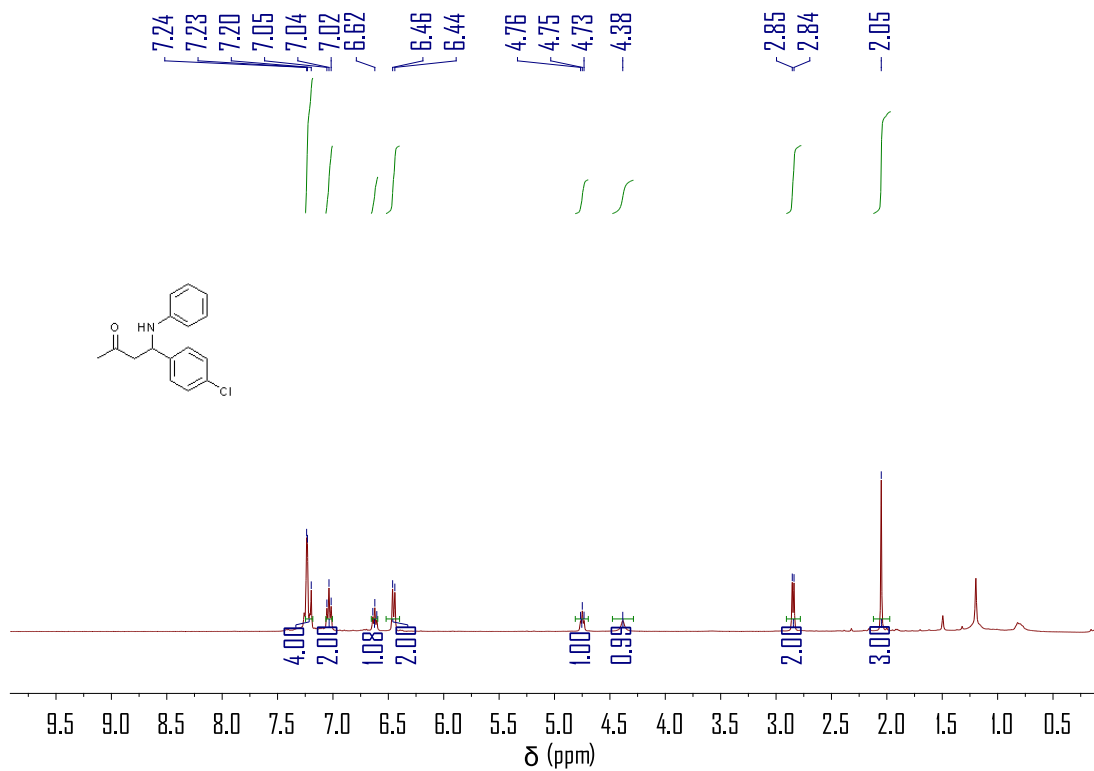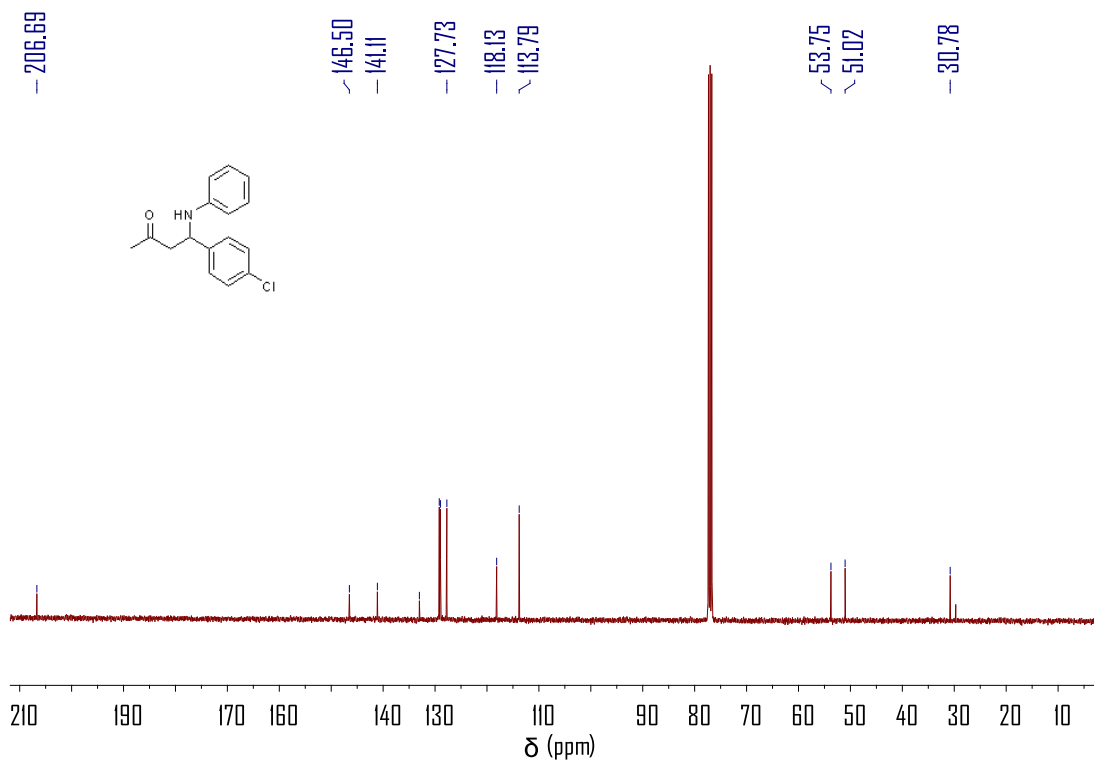

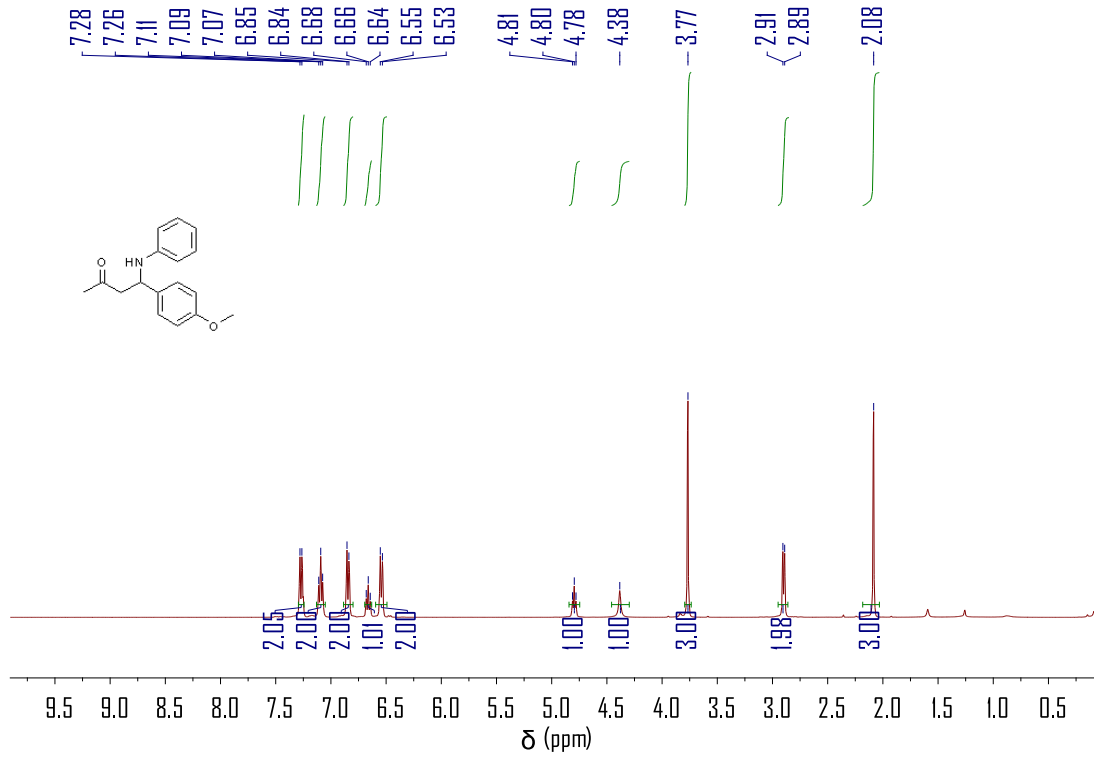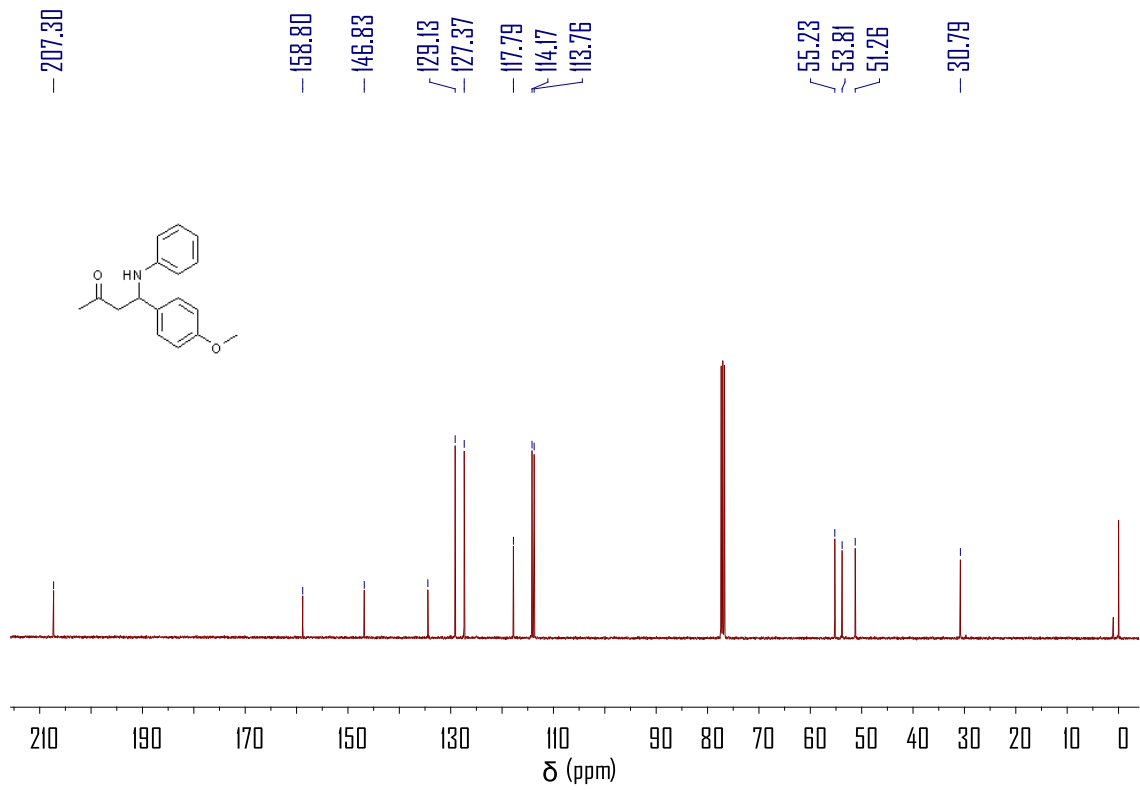

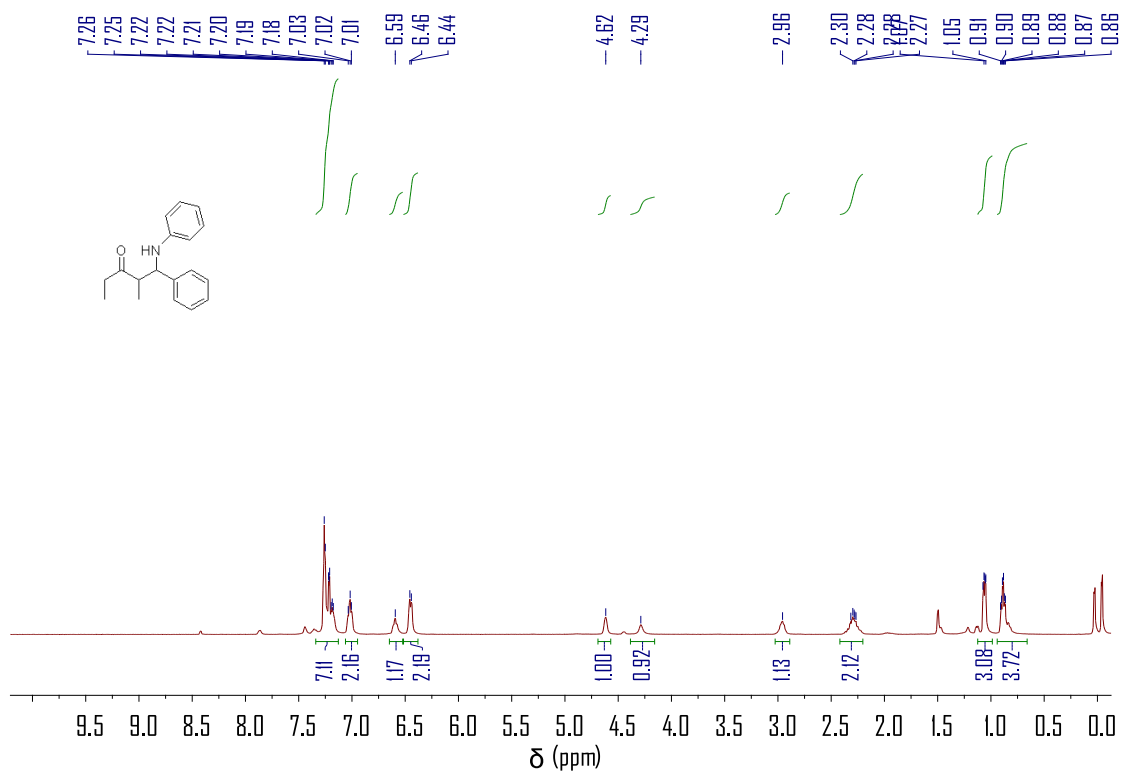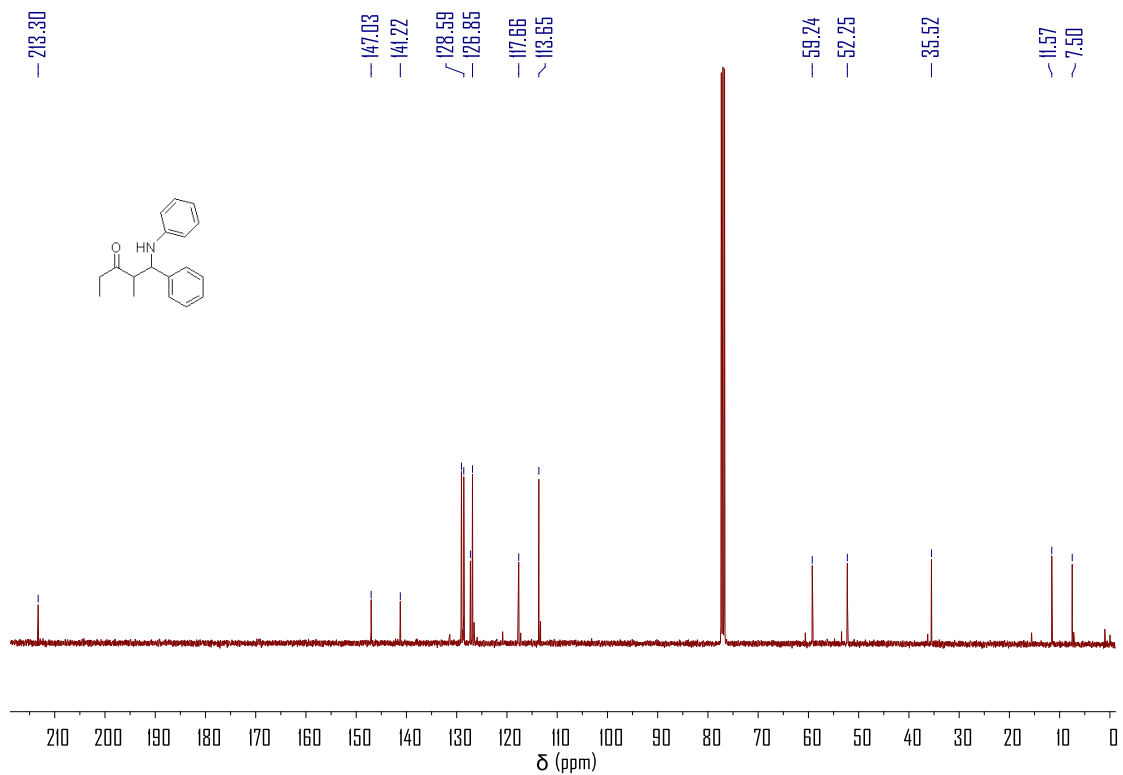

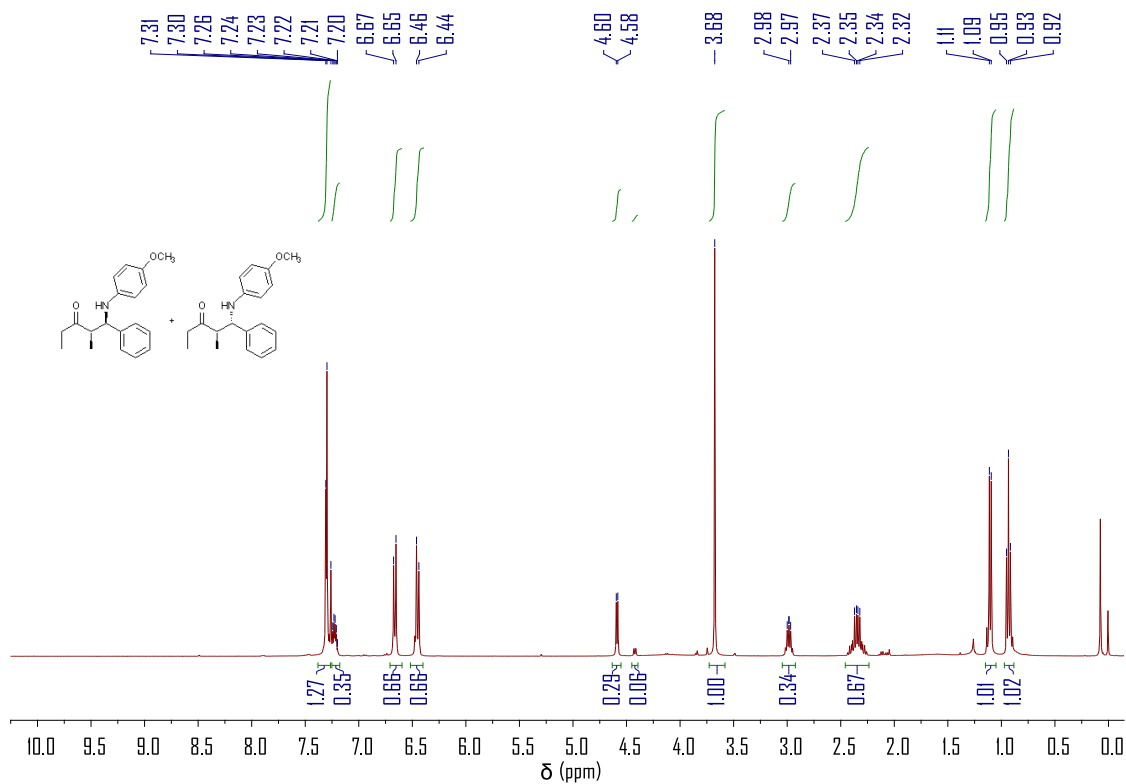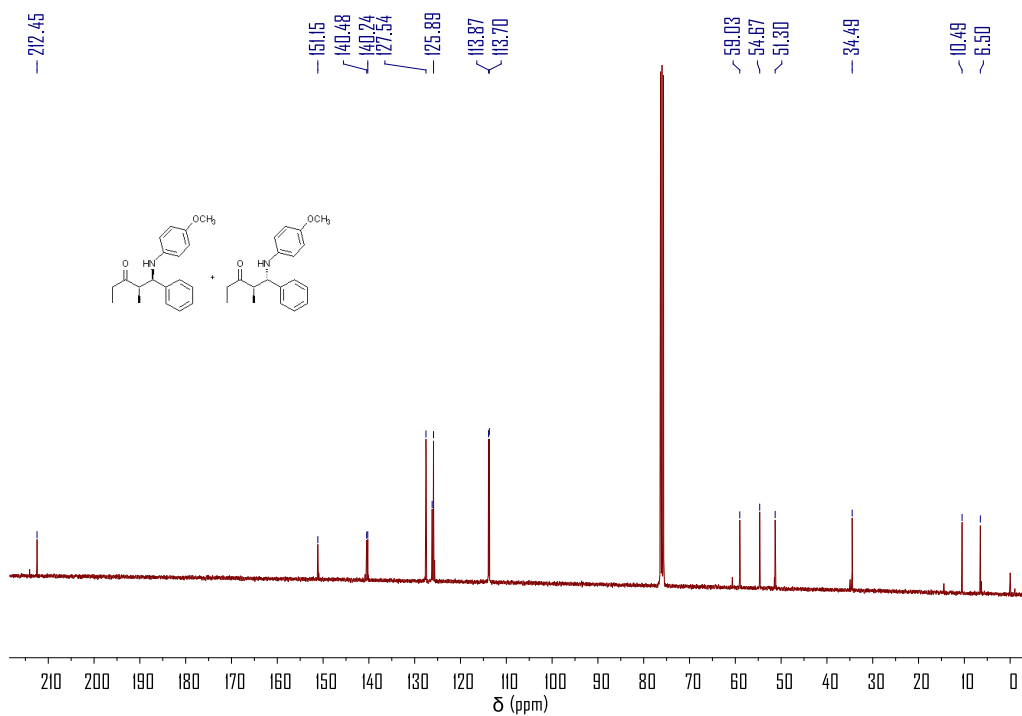

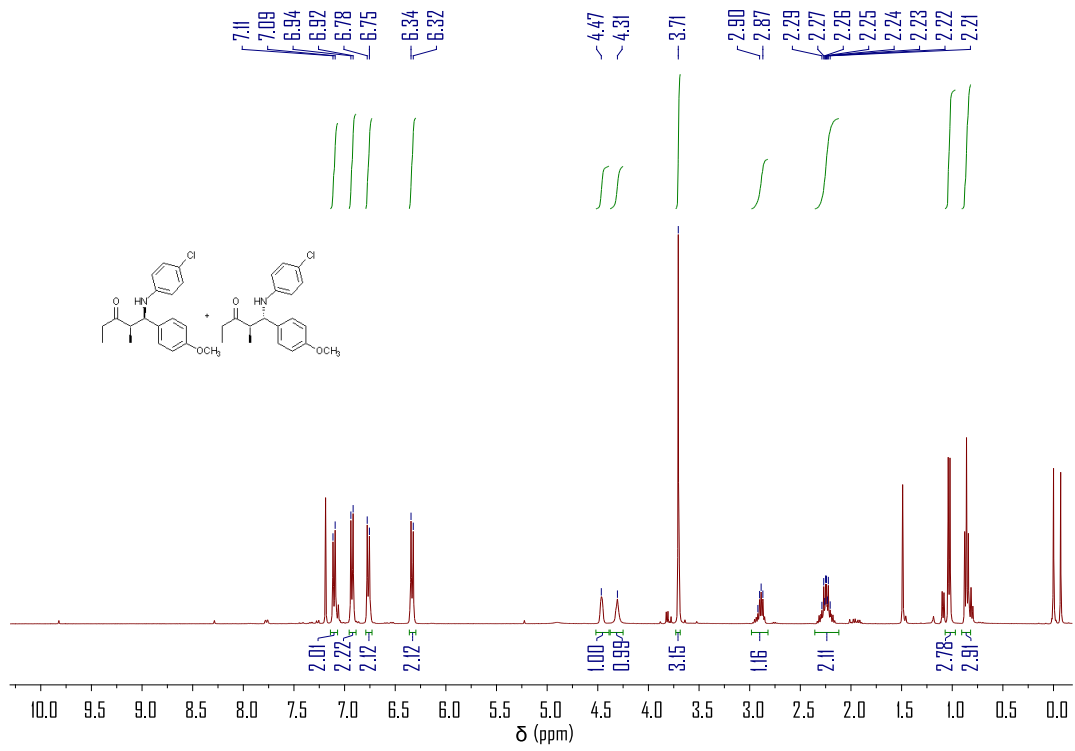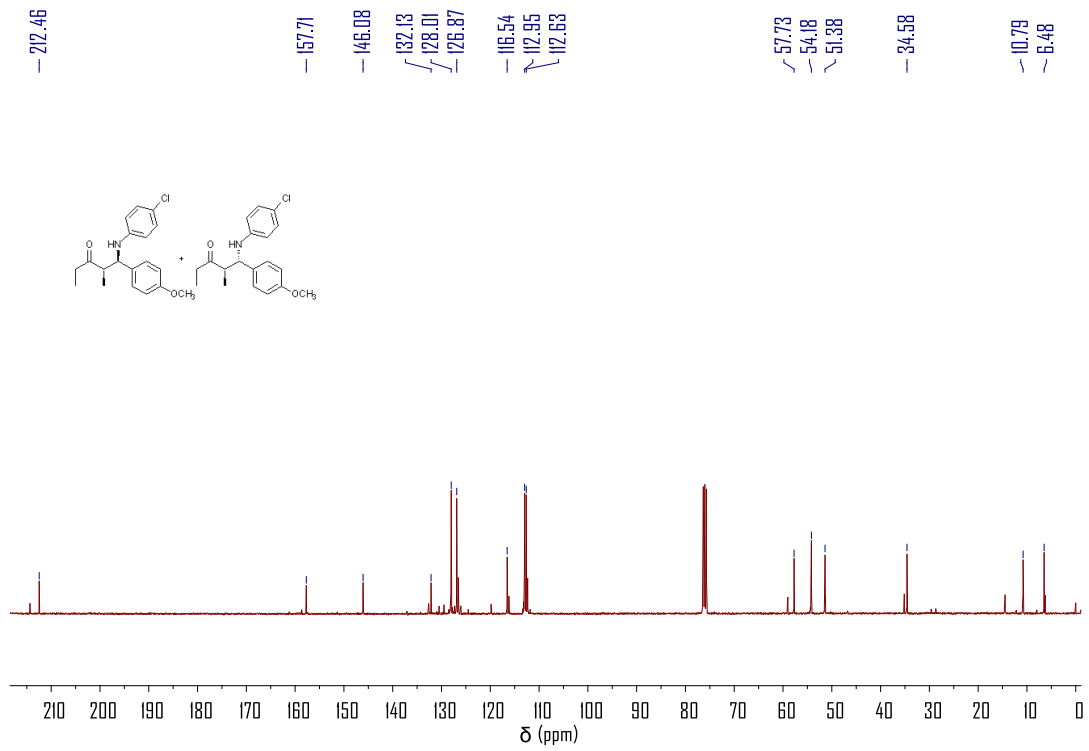

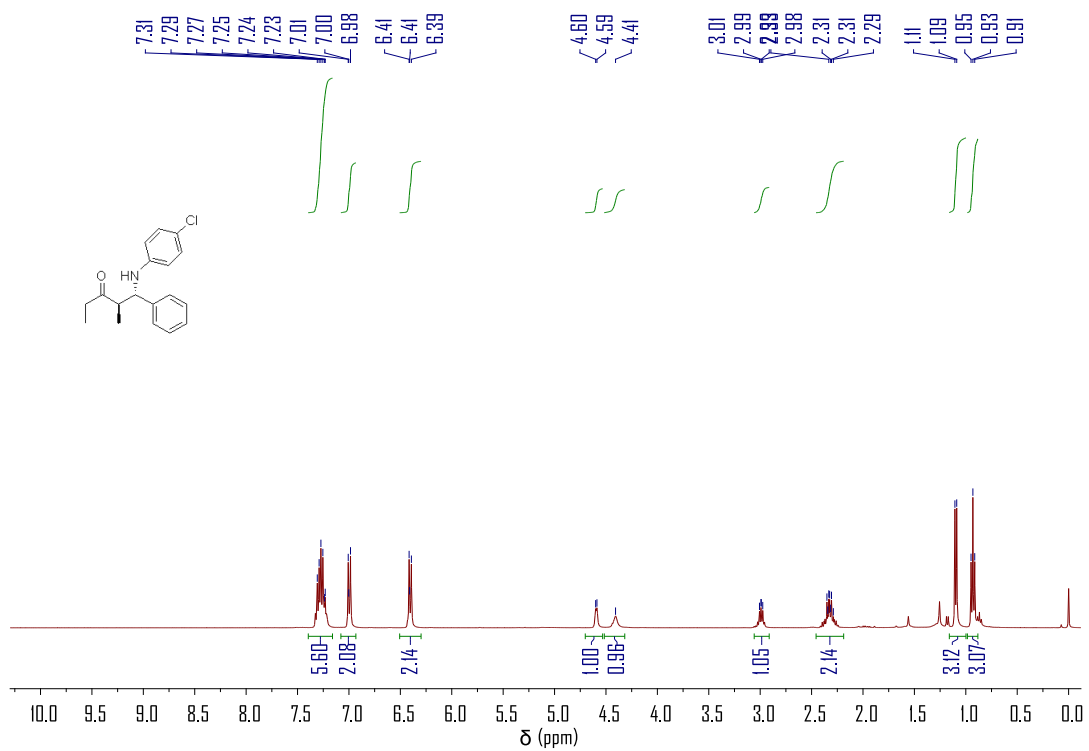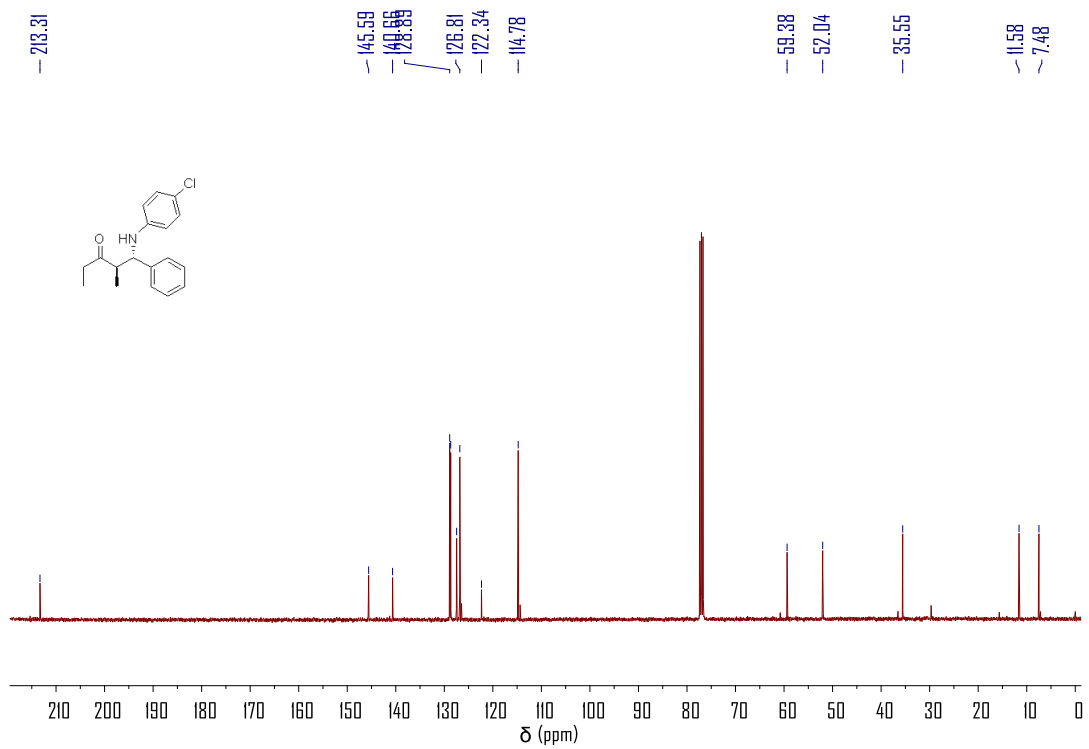



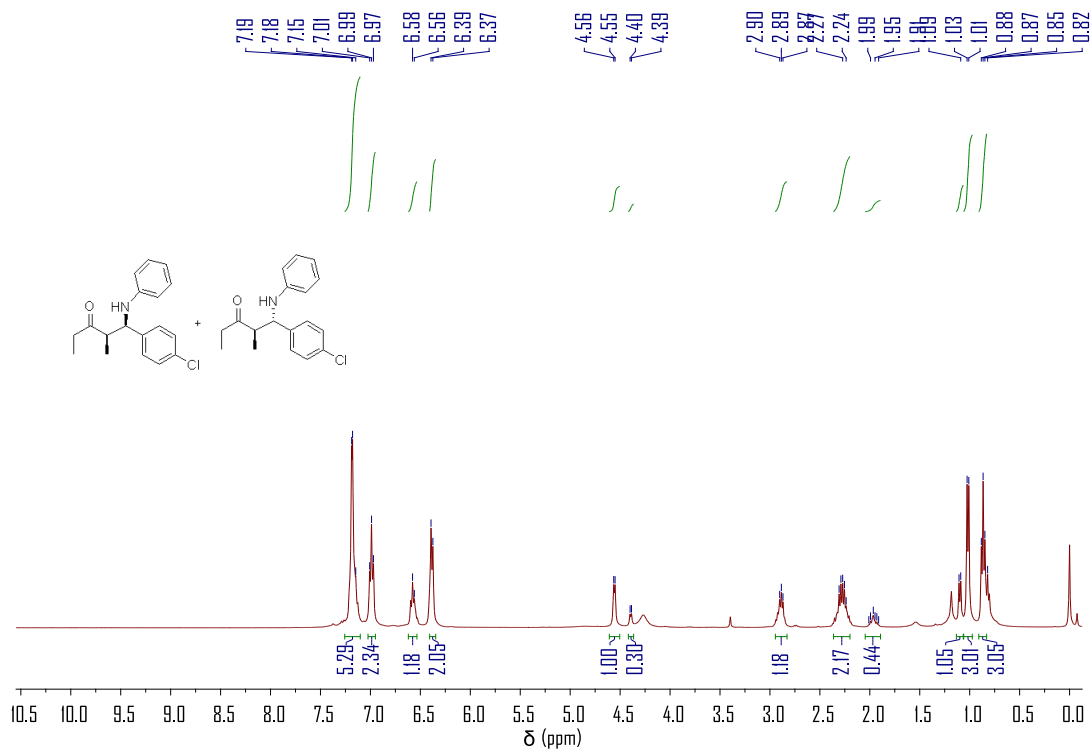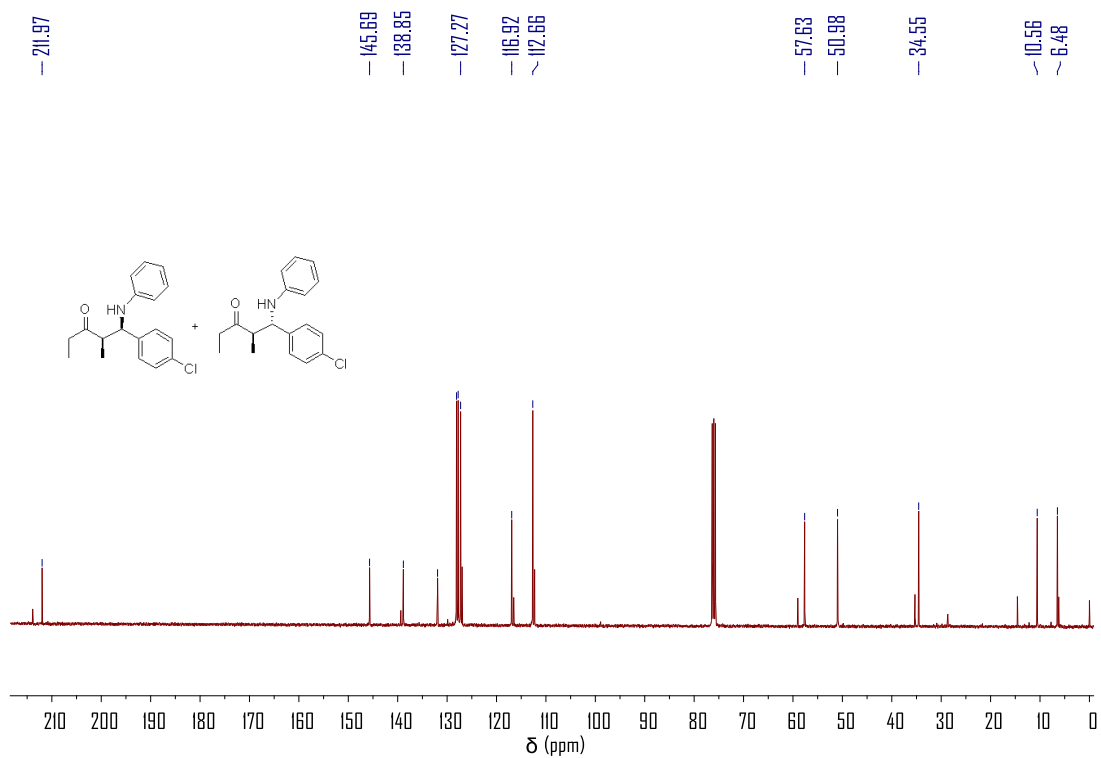

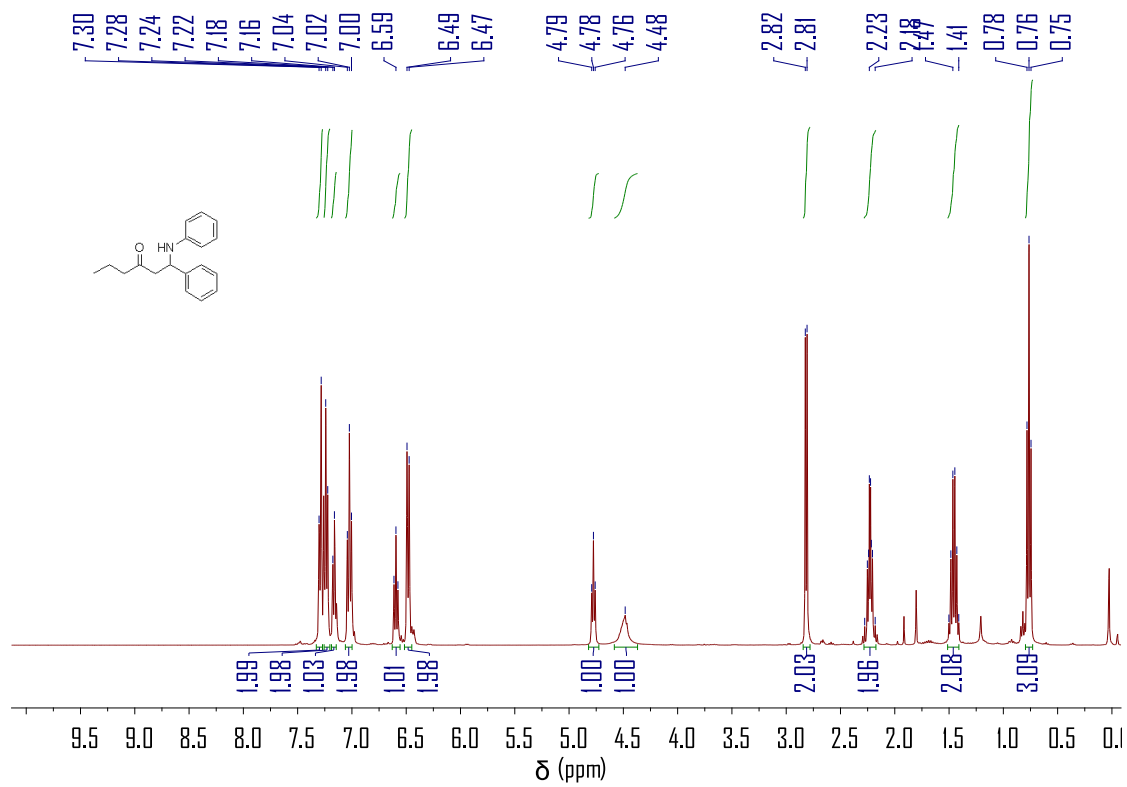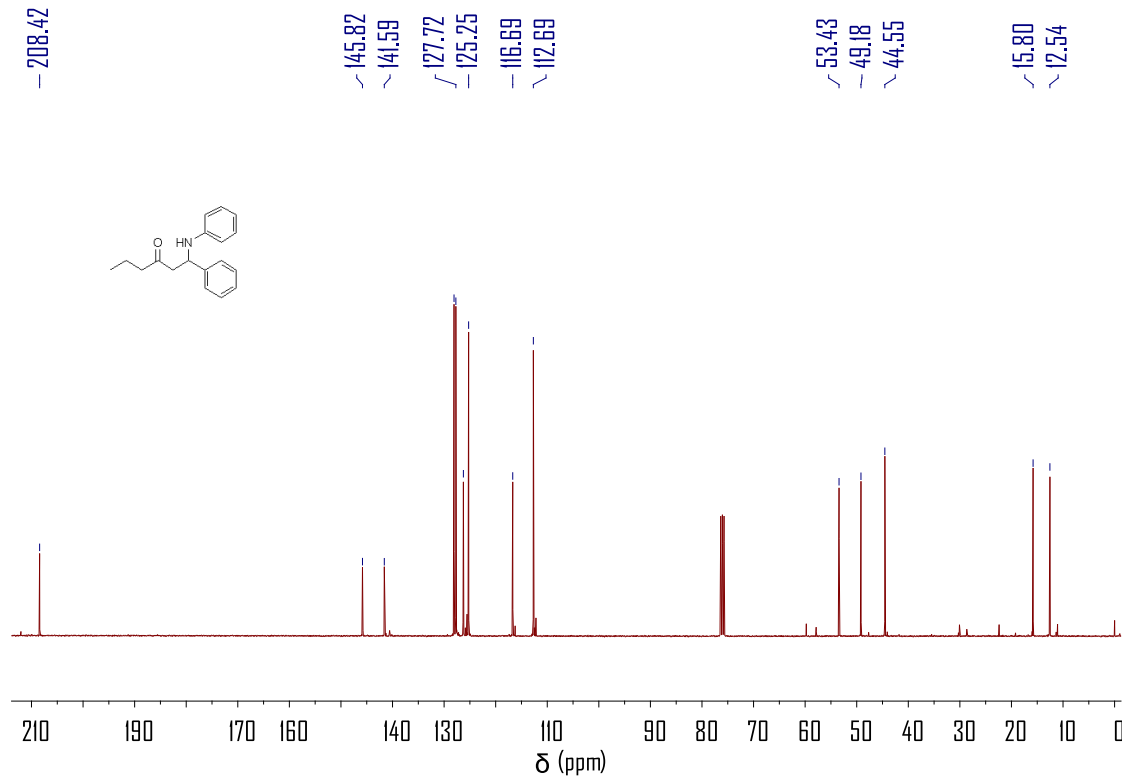

Supplement: c5ra27094d1.pdf [file c5ra27094d1.pdf]
